# Supplementary material for: Does a multiply bonded oxo ligand directly participate in B–H bond activation by a high-valent di-oxo-molybdenum(vi) complex? A density functional theory study
Source: Royal Society of Chemistry journal article supplement (doi:10.1039/c5cy00177c), 2015-01-01
Supplement: c5cy00177c1.pdf [file c5cy00177c1.pdf]

### Supporting Information

## Does the Multiply Bound Oxo Ligand Directly Participate in the B–H bond Activation by the High-Valent Di-Oxo-Molybdenum(VI) Complex? A Density Functional Theory Study

Liangfang Huang, Jiandi Wang, Xiaoqin Wei, Haiyan Wei\*

1. Complete reference of 28
2. **Table S1** The calculated free energies of key intermediates and transition states at M06(BS1) and M06(BS2) are listed for MoO<sub>2</sub>Cl<sub>2</sub> catalyzing the reduction of benzamide, N-(diphenylmethylene)benzenamine, and benzonitrile and sulfoxides with boranes.
3. **Figure 1a.** Calculated geometric structures along ionic outer-sphere pathway: **TS4**→**4**→**TS5**→**5**→**TS6** for MoO<sub>2</sub>Cl<sub>2</sub>-catalyzed hydroboration of (diphenylmethylene)benzenamine (PhCPh=NPh). **Figure 1b.** Calculated geometric structures along ionic outer-sphere pathway: **TS4**→**4**→**TS5**→**5**→**TS6** for MoO<sub>2</sub>Cl<sub>2</sub>-catalyzed hydroboration of benzonitrile (PhC≡N). **Figure 1c.** Calculated geometric structures along ionic outer-sphere pathway: **TS4**→**4**→**TS5**→**5**→**TS6** for MoO<sub>2</sub>Cl<sub>2</sub>-catalyzed hydroboration of sulfoxides (Ph<sub>2</sub>S=O).
4. **Table S2.** The NBO charge along the ionic outer-sphere mechanistic pathway calculated for catalytic reduction of benzamide, N-(diphenylmethylene)benzenamine, and benzonitrile and sulfoxides with boranes by the high-valent di-oxo-molybdenum(VI) complex MoO<sub>2</sub>Cl<sub>2</sub>.
5. **Figure 2** Selected molecular orbitals (HOMO and LUMO) along the ionic outer-sphere mechanistic pathway (**TS4**→**4**→**TS5**→**5**).
6. **Figure 3a.** Calculated geometric structures along the [2+2] addition pathway: **8**→**TS9**→**9**→**TS10** for MoO<sub>2</sub>Cl<sub>2</sub>-catalyzed hydroboration of (diphenylmethylene)benzenamine (PhCPh=NPh). **Figure 3b.** Calculated geometric structures along the [2+2] addition pathway: **8**→**TS9**→**9**→**TS10** or MoO<sub>2</sub>Cl<sub>2</sub>-catalyzed hydroboration of benzonitrile (PhC≡N).
7. **Figure 4.** Calculated geometric structures with the [2+2] addition transition state (**TS11**) and the [2+2] intermediate (**11**) start with sulfoxide complex, MoO<sub>2</sub>Cl<sub>2</sub>(Ph<sub>2</sub>SO).

Table S3 Cartesian coordinates for all optimized structures in XYZ format.

### Complete reference of 28

Frisch, M. J. et al. *Gaussian 09*; Gaussian, Inc. Frisch, M. J.; Trucks, G. W.; Schlegel, H. B.; Scuseria, G. E.; Robb, M. A.; Cheeseman, J. R.; Montgomery, Jr., J. A.; Vreven, T.; Kudin, K. N.; Burant, J. C.; Millam, J. M.; Iyengar, S. S.; Tomasi, J.; Barone, V.; Mennucci, B.; Cossi, M.; Scalmani, G.; Rega, N.; Petersson, G. A.; Nakatsuji, H.; Hada, M.; Ehara, M.; Toyota, K.; Fukuda, R.; Hasegawa, J.; Ishida, M.; Nakajima, T.; Honda, Y.; Kitao, O.; Nakai, H.; Klene, M.; Li, X.; Knox, J. E.; Hratchian, H. P.; Cross, J. B.; Bakken, V.; Adamo, C.; Jaramillo, J.; Gomperts, R.; Stratmann, R. E.; Yazyev, O.; Austin, A. J.; Cammi, R.; Pomelli, C.; Ochterski, J. W.; Ayala, P. Y.; Morokuma, K.; Voth, G. A.; Salvador, P.; Dannenberg, J. J.; Zakrzewski, V. G.; Dapprich, S.; Daniels, A. D.; Strain, M. C.; Farkas, O.; Malick, D. K.; Rabuck, A. D.; Raghavachari, K.; Foresman, J. B.; Ortiz, J. V.; Cui, Q.; Baboul, A. G.; Clifford, S.; Cioslowski, J.; Stefanov, B. B.; Liu, G.; Liashenko, A.; Piskorz, P.; Komaromi, I.; Martin, R. L.; Fox, D. J.; Keith, T.; Al-Laham, M. A.; Peng, C. Y.; Nanayakkara, A.; Challacombe, M.; Gill, P. M. W.; Johnson, B.; Chen, W.; Wong, M. W.; Gonzalez, C.; and Pople, J. A.; Gaussian, Inc., Pittsburgh PA., 2009.

**Table S1** The calculated free energies of key intermediates and transition states at M06(BS1) and M06(BS2) are listed for MoO<sub>2</sub>Cl<sub>2</sub> catalyzing the reduction of benzamide, N-(diphenylmethylene)benzenamine, and benzonitrile and sulfoxides with boranes.

|            | PhCPh=NPh                            |                                      | PhC≡N                                |                                      |
|------------|--------------------------------------|--------------------------------------|--------------------------------------|--------------------------------------|
|            | M06<br>{6-<br>311G(d,p)<br>+Lan2LDZ} | M06<br>{6-<br>311++G(2d,p)<br>+QVZP} | M06<br>{6-<br>311G(d,p)<br>+Lan2LDZ} | M06<br>{6-<br>311++G(2d,p)<br>+QVZP} |
| <b>1</b>   | 0.0                                  | 0.0                                  | 0.0                                  | 0.0                                  |
| <b>2</b>   | 9.3                                  | 10.6                                 | 9.3                                  | 10.6                                 |
| <b>TS4</b> | 15.1                                 | 19.3                                 | 20.8                                 | 23.4                                 |
| <b>4</b>   | 7.7                                  | 15.3                                 | 18.1                                 | 23.9                                 |
| <b>TS5</b> | 9.4                                  | 19.7                                 | 21.0                                 | 29.9                                 |
| <b>5</b>   | -0.6                                 | 11.7                                 | 4.7                                  | 28.5                                 |
| <b>TS6</b> | 6.5                                  | 17.3                                 | 21.9                                 | 30.6                                 |
| <b>6</b>   | -17.0                                | -12.4                                | -4.9                                 | -2.9                                 |

|            | PhC=ONH <sub>2</sub>                 |                                      | PhC=ONH <sub>2</sub>         |
|------------|--------------------------------------|--------------------------------------|------------------------------|
|            | M06<br>{6-<br>311G(d,p)<br>+Lan2LDZ} | M06<br>{6-<br>311++G(2d,p)<br>+QVZP} | M06<br>{6-311G(d,p)<br>+SDD} |
| <b>1</b>   | 0.0                                  | 0.0                                  |                              |
| <b>2</b>   | 8.8                                  | 10.6                                 |                              |
| <b>3</b>   | 15.9                                 | 19.0                                 |                              |
| <b>TS4</b> | 17.1                                 | 17.2                                 |                              |
| <b>4</b>   | 9.8                                  | 13.3                                 |                              |
| <b>TS5</b> | 11.0                                 | 15.9                                 |                              |
| <b>5</b>   | 9.3                                  | 14.2                                 |                              |
| <b>TS6</b> | 18.7                                 | 22.7                                 |                              |
| <b>6</b>   | 1.0                                  | 2.7                                  |                              |
| <b>TS7</b> | 27.5                                 | 27.6                                 | 26.6                         |
| <b>7</b>   | -1.1                                 | 3.6                                  | -1.0                         |

|            | Ph <sub>2</sub> S=O                  |                                      |
|------------|--------------------------------------|--------------------------------------|
|            | M06<br>{6-<br>311G(d,p)<br>+Lan2LDZ} | M06<br>{6-<br>311++G(2d,p)<br>+QVZP} |
| <b>1</b>   | 0.0                                  | 0.0                                  |
| <b>2</b>   | 9.3                                  | 10.6                                 |
| <b>TS4</b> | 15.1                                 | 21.3                                 |
| <b>4</b>   | 9.6                                  | 17.0                                 |
| <b>TS5</b> | 9.1                                  | 18.3                                 |
| <b>5</b>   | 0.6                                  | 11.1                                 |
| <b>TS6</b> | 23.7                                 | 38.8                                 |
| <b>6</b>   | -60.2                                | -50.4                                |
| <b>TS1</b> | 17.3                                 | 24.0                                 |
| <b>1</b>   | -9.7                                 | -0.3                                 |
| <b>11</b>  |                                      |                                      |

**Figure 1a.** Calculated geometric structures along ionic outer-sphere pathway: **TS4**→**4**→**TS5**→**5**→**TS6** for MoO<sub>2</sub>Cl<sub>2</sub>-catalyzed hydroboration of (diphenylmethylene)benzenamine (PhCPh=NPh).

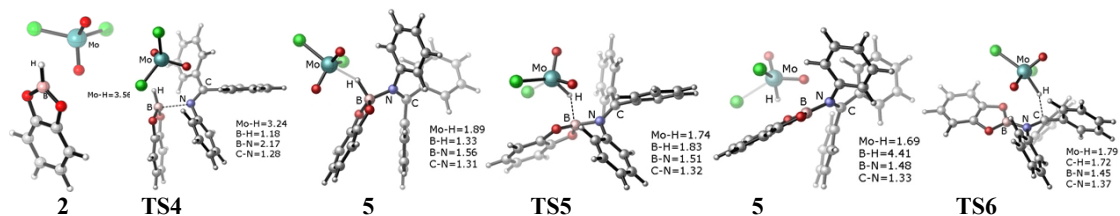

**Figure 1b.** Calculated geometric structures along ionic outer-sphere pathway: **TS4**→**4**→**TS5**→**5**→**TS6** for MoO<sub>2</sub>Cl<sub>2</sub>-catalyzed hydroboration of benzonitrile (PhC≡N)

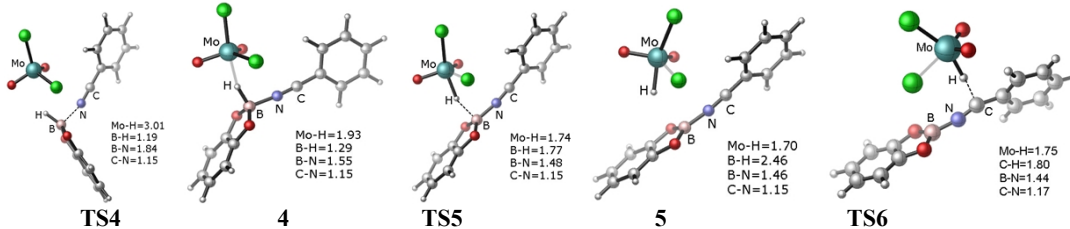

**Figure 1c.** Calculated geometric structures along ionic outer-sphere pathway: **TS4**→**4**→**TS5**→**5** for MoO<sub>2</sub>Cl<sub>2</sub>-catalyzed hydroboration of sulfoxides (Ph<sub>2</sub>S=O).

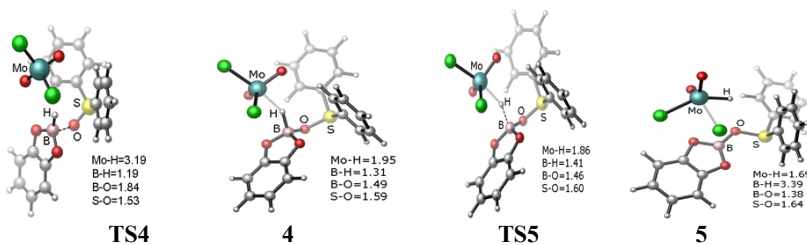

**Table S2.** The NBO charge along the ionic outer-sphere mechanistic pathway calculated for catalytic reduction of benzamide, N-(diphenylmethylene)benzenamine, and benzonitrile and sulfoxides with boranes by the high-valent dioxo-molybdenum(VI) complex MoO<sub>2</sub>Cl<sub>2</sub>.

|                      |        | <b>3</b> | <b>TS4</b> | <b>4</b> | <b>TS5</b> | <b>5</b> |
|----------------------|--------|----------|------------|----------|------------|----------|
| Ph <sub>2</sub> S=O  | Mo     | 0.98     | 0.98       | 0.85     | 0.84       | 0.73     |
|                      | H      | -0.12    | -0.15      | -0.15    | -0.14      | -0.00    |
|                      | B      | 0.97     | 0.96       | 1.08     | 1.14       | 1.28     |
|                      | O(S=O) | -0.97    | -0.92      | -0.86    | -0.86      | -0.84    |
| PhC≡N                | Mo     | 0.97     | 0.96       | 0.85     | 0.77       | 0.72     |
|                      | H      | -0.12    | -0.13      | -0.13    | -0.08      | -0.02    |
|                      | B      | 0.95     | 0.90       | 0.97     | 1.14       | 1.17     |
|                      | N(C≡N) | -0.40    | -0.40      | -0.41    | -0.47      | -0.49    |
| PhCPh=NPh            | Mo     | 0.98     | 0.98       | 0.86     | 0.70       | 0.71     |
|                      | H      | -0.11    | -0.13      | -0.12    | -0.02      | 0.03     |
|                      | B      | 0.95     | 0.96       | 1.08     | 1.29       | 1.30     |
|                      | N(C=N) | -0.51    | -0.51      | -0.59    | -0.64      | -0.65    |
| PhC=ONH <sub>2</sub> | Mo     | 1.03     | 1.03       | 0.91     | 0.83       | 0.80     |
|                      | H      | -0.12    | -0.13      | -0.14    | -0.10      | -0.02    |
|                      | B      | 0.98     | 0.97       | 1.07     | 1.25       | 1.29     |
|                      | O(C=O) | -0.67    | -0.67      | -0.65    | -0.67      | -0.67    |

**Conclusion:** our conclusion for NBO electronic charges change along the ionic outer-sphere mechanistic pathway is similar with four substrates of benzamide (PhC=ONH<sub>2</sub>), N-(diphenylmethylene)benzenamine (PhCPh=NPh), benzonitrile (PhC≡N), and diphenyl sulfoxide (Ph<sub>2</sub>S=O). For example, along the ionic outer-sphere mechanistic pathway, with substrate of *N*-(diphenylmethylene)benzenamine, as a consequence of the transformation from van der Waals species **3** into the ion pair **5**, natural bond order (NBO) charge analysis reveals that the migrating H atom of borane in **3** has a negative charge (-0.11 *e*). Accompanied by the B–H bond cleavage, the calculated NBO negative charge on the borane hydrogen decreases to -0.02 *e* in **TS5**, and to almost neutral in intermediate **5** (0.03 *e*). Accordingly, the NBO charge trend on the borane center is reversed and becomes positively charged, i.e., 0.96 *e*, 1.08 *e* (**TS4**, **4**) → 1.29 *e*, 1.30 *e* (**TS5**, **5**) during this step. When the electron density from borane effectively drains to the molybdenum metal center, the NBO charge on the molybdenum center becomes less positively charged, going from 0.98 *e* → 0.86 *e* → 0.70 *e* → 0.71 *e*. This trend is similar to the substrate of benzamide (PhC=ONH<sub>2</sub>), as discussed in the manuscript, Page 4, paragraph 3. Also, along the ionic outer-sphere mechanistic pathway, with substrate of benzonitrile (PhC≡N), as a consequence of the transformation from van der Waals species **3** into the ion pair **5**, natural bond order (NBO) charge analysis reveals that the migrating H atom of borane in **3** has a negative charge (-0.12 *e*). Accompanied by the B–H bond cleavage, the calculated NBO negative charge on the borane hydrogen decreases to -0.08 *e* in **TS5**, and to almost neutral in intermediate **5** (-0.02 *e*). Accordingly, the NBO charge trend on the borane center is reversed and becomes positively charged, i.e., 0.90 *e*, 0.97 *e* (**TS4**, **4**) → 1.14 *e*, 1.17 *e* (**TS5**, **5**) during this step. When the electron density from borane effectively drains to the molybdenum metal center, the NBO charge on the molybdenum center becomes less positively charged, going from 0.96 *e* → 0.85 *e* → 0.77 *e* → 0.72 *e*.

Figure 2 Selected molecular orbitals (HOMO and LUMO) along the ionic outer-sphere mechanistic pathway (TS4→4→TS5→5).

| TS4              | 4                | TS5              | 5                |
|------------------|------------------|------------------|------------------|
|                  |                  |                  |                  |
| HOMO: (-0.23038) | HOMO: (-0.23089) | HOMO: (-0.25028) | HOMO: (-0.26054) |
|                  |                  |                  |                  |
| LUMO: (-0.14234) | LUMO: (-0.13135) | LUMO: (-0.10591) | LUMO: (-0.10011) |

Figure 3a. Calculated geometric structures along the [2+2] addition pathway: 8→TS9→9→TS10 for MoO<sub>2</sub>Cl<sub>2</sub>-catalyzed hydroboration of (diphenylmethylene)benzenamine (PhCPh=NPh).

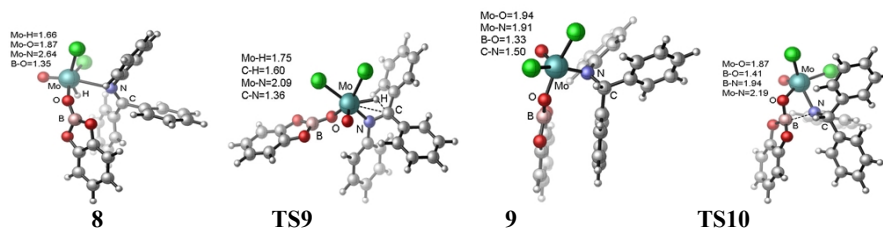

Figure 3b Calculated geometric structures along the [2+2] addition pathway: 8→TS9→9→TS10 for MoO<sub>2</sub>Cl<sub>2</sub>-catalyzed hydroboration of benzonitrile (PhC≡N)

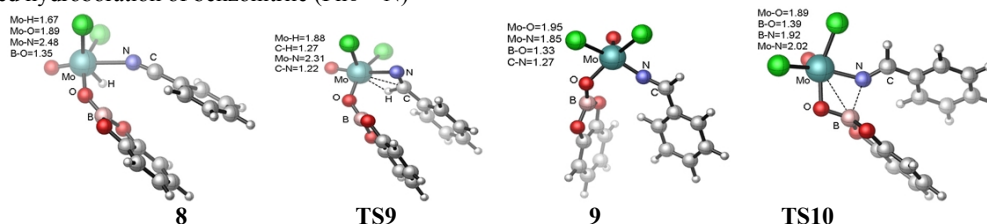

Figure 4 Calculated geometric structures with the [2+2] addition transition state (TS11) and the [2+2] intermediate (INT11) start with sulfoxide complex, MoO<sub>2</sub>Cl<sub>2</sub>(Ph<sub>2</sub>SO).

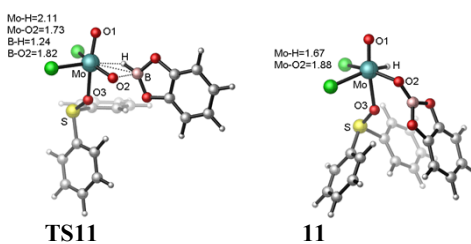

**Table S3** Cartesian coordinates for all optimized structures in XYZ format.

|                                          |           |           |           |                        |           |           |           |
|------------------------------------------|-----------|-----------|-----------|------------------------|-----------|-----------|-----------|
| <b>1 (MoO<sub>2</sub>Cl<sub>2</sub>)</b> |           |           |           | C                      | -3.668302 | 0.409073  | -2.712272 |
| Mo                                       | 0.096913  | -0.396874 | 0.240281  | C                      | -2.485460 | -0.293374 | -2.912643 |
| O                                        | -0.067752 | 0.711872  | 1.469659  | C                      | 2.168486  | 2.158452  | 1.560852  |
| O                                        | 1.652949  | -0.225419 | -0.322890 | C                      | 3.088992  | 2.079950  | 2.594569  |
| Cl                                       | -1.358231 | 0.106173  | -1.419921 | C                      | 2.811223  | 1.308252  | 3.715541  |
| Cl                                       | -0.169882 | -2.484229 | 1.076028  | C                      | 1.615595  | 0.605711  | 3.794787  |
| <b>2</b>                                 |           |           |           | C                      | 0.704770  | 0.662387  | 2.752160  |
| Cl                                       | -3.801342 | 0.178321  | -0.646172 | H                      | 0.145443  | 4.098237  | -3.348449 |
| Mo                                       | -1.760454 | 0.950074  | -0.037721 | H                      | 0.353017  | 1.945581  | -2.158688 |
| H                                        | 1.540327  | 2.085669  | 0.236600  | H                      | -0.555456 | 3.906391  | 1.545829  |
| B                                        | 1.948821  | 0.998352  | 0.049148  | H                      | -0.810862 | 6.051958  | 0.347128  |
| O                                        | 2.556396  | 0.591698  | -1.116638 | H                      | -0.454349 | 6.154288  | -2.102735 |
| C                                        | 2.845986  | -0.732790 | -0.922271 | H                      | -4.089436 | -2.761460 | -1.243429 |
| C                                        | 2.430197  | -1.105235 | 0.348589  | H                      | -6.255817 | -1.872039 | -0.367695 |
| C                                        | 2.598615  | -2.384124 | 0.828338  | H                      | -6.377831 | -0.812043 | 1.846139  |
| C                                        | 3.209311  | -3.293542 | -0.033498 | H                      | -2.984279 | 1.716395  | 0.349077  |
| C                                        | 3.625259  | -2.921210 | -1.308996 | H                      | -4.771581 | 1.666932  | -1.361922 |
| C                                        | 3.450480  | -1.621382 | -1.782263 | H                      | -4.449351 | 0.392173  | -3.466337 |
| O                                        | 1.872959  | -0.020496 | 0.973122  | H                      | -2.336456 | -0.860993 | -3.826887 |
| O                                        | -0.581316 | 0.081652  | -0.832533 | H                      | -0.567148 | -0.833012 | -2.087368 |
| O                                        | -1.582349 | 2.527607  | -0.536357 | H                      | -0.233441 | 0.118844  | 2.810003  |
| Cl                                       | -1.374888 | 0.814094  | 2.184003  | H                      | 1.391188  | 0.011398  | 4.675516  |
| H                                        | 2.273201  | -2.662916 | 1.824527  | H                      | 3.526584  | 1.258862  | 4.531328  |
| H                                        | 3.364380  | -4.314830 | 0.299529  | H                      | 4.022831  | 2.630314  | 2.529571  |
| H                                        | 4.097250  | -3.657949 | -1.951139 | H                      | 2.384363  | 2.769519  | 0.688548  |
| H                                        | 3.772165  | -1.319484 | -2.772924 | <b>TS4 (PhCPh=NPh)</b> |           |           |           |
| <b>3 (PhCPh=NPh)</b>                     |           |           |           | Mo                     | 2.684359  | -1.412396 | -0.559405 |
| Mo                                       | 2.664906  | -1.272534 | -0.649756 | Cl                     | 4.717128  | -1.692968 | -1.518815 |
| Cl                                       | 4.781247  | -1.709886 | -1.331108 | O                      | 2.868537  | -1.358477 | 1.091605  |
| O                                        | 2.645208  | -1.121471 | 1.004110  | O                      | 2.064040  | 0.066376  | -1.013215 |
| O                                        | 2.177943  | 0.197288  | -1.264945 | Cl                     | 1.251020  | -3.059095 | -1.148813 |
| Cl                                       | 1.266172  | -2.928992 | -1.309963 | H                      | 0.175067  | -1.550259 | 1.482009  |
| H                                        | 0.107495  | -2.303627 | 1.544143  | B                      | -0.976858 | -1.424167 | 1.251135  |
| B                                        | -1.043395 | -2.117228 | 1.393940  | O                      | -1.612314 | -2.162626 | 0.242797  |
| O                                        | -1.760169 | -2.548858 | 0.297252  | O                      | -1.912797 | -1.076442 | 2.247100  |
| O                                        | -1.869833 | -1.559979 | 2.353383  | C                      | -2.944318 | -2.067885 | 0.512800  |
| C                                        | -3.050796 | -2.165664 | 0.541688  | C                      | -3.126156 | -1.410994 | 1.726597  |
| C                                        | -3.118144 | -1.563013 | 1.791257  | C                      | -4.380764 | -1.166144 | 2.236887  |
| C                                        | -4.296920 | -1.066874 | 2.299484  | H                      | -4.512947 | -0.650778 | 3.182641  |
| H                                        | -4.339076 | -0.597884 | 3.276722  | C                      | -4.007914 | -2.502114 | -0.244181 |
| C                                        | -4.157023 | -2.298160 | -0.264778 | C                      | -5.286381 | -2.254832 | 0.262270  |
| C                                        | -5.357095 | -1.794666 | 0.236310  | C                      | -5.468460 | -1.601699 | 1.475290  |
| C                                        | -5.425890 | -1.192307 | 1.488990  | N                      | -0.810237 | 0.489113  | 0.244410  |
| N                                        | -0.652113 | 0.434335  | 0.207139  | C                      | -0.048414 | 1.490274  | 0.503964  |
| C                                        | 0.013169  | 1.489293  | 0.499601  | C                      | 0.877825  | 1.451649  | 1.658703  |
| C                                        | 0.973303  | 1.439509  | 1.625146  | C                      | -1.772271 | 0.566324  | -0.796382 |
| C                                        | -1.655274 | 0.463476  | -0.780748 | C                      | -1.589996 | -0.168745 | -1.963758 |
| C                                        | -1.491559 | -0.280101 | -1.947559 | C                      | -0.037998 | 2.746433  | -0.296354 |
| C                                        | -0.100641 | 2.782983  | -0.230874 | C                      | 0.201033  | 2.740530  | -1.670026 |
| C                                        | 0.096396  | 2.846220  | -1.609325 | C                      | -0.272952 | 3.958002  | 0.352798  |
| C                                        | -0.411561 | 3.948222  | 0.468925  | C                      | -0.302840 | 5.143209  | -0.366615 |
| C                                        | -0.552168 | 5.152953  | -0.204222 | C                      | -0.065741 | 5.131489  | -1.734416 |
| C                                        | -0.353555 | 5.209313  | -1.577213 | C                      | 0.195697  | 3.930697  | -2.381522 |
| C                                        | -0.021012 | 4.056342  | -2.276324 | C                      | -2.943844 | 1.293537  | -0.608265 |
| C                                        | -2.847261 | 1.157097  | -0.573495 | C                      | -3.917120 | 1.303699  | -1.596617 |
| C                                        | -3.846182 | 1.124505  | -1.534959 | C                      | -3.728260 | 0.589683  | -2.772508 |
|                                          |           |           |           | C                      | -2.561847 | -0.144809 | -2.951731 |
|                                          |           |           |           | C                      | 2.162508  | 1.986028  | 1.524919  |

|   |           |           |           |   |           |           |           |
|---|-----------|-----------|-----------|---|-----------|-----------|-----------|
| C | 3.049053  | 1.954601  | 2.588707  | H | -4.770072 | -0.195769 | 0.349398  |
| C | 2.652686  | 1.420727  | 3.808629  | H | -6.363311 | -2.000459 | -0.211811 |
| C | 1.369446  | 0.913094  | 3.957742  | H | -5.579455 | -4.011018 | -1.423035 |
| C | 0.486497  | 0.921125  | 2.888034  | H | 0.638204  | 4.070723  | -1.768579 |
| H | 0.395796  | 3.919510  | -3.448521 | H | 1.187807  | 6.014176  | -0.293337 |
| H | 0.409248  | 1.805031  | -2.179089 | H | 1.411564  | 5.720751  | 2.137842  |
| H | -0.446139 | 3.967839  | 1.425864  | H | -2.065486 | -0.793324 | 2.700673  |
| H | -0.503901 | 6.079374  | 0.145118  | H | -1.775426 | -2.752579 | 4.198658  |
| H | -0.078334 | 6.060453  | -2.296373 | H | -0.323002 | -4.636104 | 3.499242  |
| H | -3.852741 | -3.002158 | -1.194872 | H | 0.818512  | -4.563562 | 1.302177  |
| H | -6.153133 | -2.577366 | -0.306411 | H | 0.499233  | -2.627535 | -0.199045 |
| H | -6.475392 | -1.423548 | 1.840181  | H | -2.031513 | 1.859790  | 1.583733  |
| H | -3.085528 | 1.841391  | 0.320276  | H | -2.836449 | 4.173289  | 1.258160  |
| H | -4.829251 | 1.873039  | -1.444171 | H | -3.773012 | 4.858284  | -0.931316 |
| H | -4.490410 | 0.600208  | -3.545637 | H | -3.957407 | 3.215117  | -2.772512 |
| H | -2.408927 | -0.708783 | -3.867258 | H | -3.220499 | 0.879089  | -2.427951 |
| H | -0.681228 | -0.752290 | -2.087911 |   |           |           |           |
| H | -0.519259 | 0.533436  | 3.009858  |   |           |           |           |
| H | 1.050607  | 0.510512  | 4.914241  |   |           |           |           |
| H | 3.343687  | 1.408119  | 4.646237  |   |           |           |           |
| H | 4.050256  | 2.356989  | 2.469019  |   |           |           |           |
| H | 2.470375  | 2.418080  | 0.576869  |   |           |           |           |

#### 4 (PhCPh=NPh)

|    |           |           |           |
|----|-----------|-----------|-----------|
| Mo | 3.011229  | -0.644643 | -0.294705 |
| O  | 3.048982  | -1.415650 | 1.192795  |
| Cl | 4.878927  | -1.547870 | -1.369341 |
| Cl | 1.686852  | -1.258042 | -2.204450 |
| O  | 3.405043  | 0.966575  | -0.083163 |
| H  | 1.222944  | -0.270920 | 0.171046  |
| B  | 0.236530  | 0.595040  | 0.378263  |
| N  | -0.966496 | -0.405587 | 0.379730  |
| C  | -0.794670 | -1.602432 | 1.173978  |
| C  | -2.133336 | -0.148236 | -0.168390 |
| C  | -3.074644 | -1.220919 | -0.496953 |
| O  | 0.241351  | 1.547167  | -0.678479 |
| O  | 0.462529  | 1.264687  | 1.621511  |
| C  | 0.710404  | 2.555728  | 1.283688  |
| C  | 0.576863  | 2.724819  | -0.096469 |
| C  | 0.745704  | 3.952739  | -0.695264 |
| C  | 1.048531  | 5.029077  | 0.141016  |
| C  | 1.174678  | 4.863010  | 1.516009  |
| C  | 1.006016  | 3.613077  | 2.115073  |
| C  | -1.441270 | -1.632543 | 2.403714  |
| C  | -1.272199 | -2.727245 | 3.237397  |
| C  | -0.457881 | -3.780848 | 2.844765  |
| C  | 0.184655  | -3.739944 | 1.614836  |
| C  | 0.022355  | -2.648362 | 0.775199  |
| C  | -4.427656 | -1.083713 | -0.173949 |
| C  | -5.318310 | -2.095887 | -0.487950 |
| C  | -4.876189 | -3.225466 | -1.164664 |
| C  | -3.538815 | -3.349348 | -1.523427 |
| C  | -2.635421 | -2.360352 | -1.179933 |
| C  | -2.554429 | 1.231889  | -0.410556 |
| C  | -3.130964 | 1.606827  | -1.626758 |
| C  | -3.542861 | 2.913590  | -1.816049 |
| C  | -3.436087 | 3.837264  | -0.780813 |
| C  | -2.908097 | 3.456937  | 0.445514  |
| C  | -2.453079 | 2.162147  | 0.628800  |
| H  | 1.101880  | 3.472364  | 3.186678  |
| H  | -3.199857 | -4.220210 | -2.074874 |
| H  | -1.594712 | -2.445778 | -1.476692 |

#### TS5 (PhCPh=NPh)

|    |           |           |           |
|----|-----------|-----------|-----------|
| Mo | -1.419214 | -1.341339 | -1.325707 |
| Cl | -2.949590 | -0.536852 | -2.952060 |
| O  | -1.245415 | -3.000378 | -1.447972 |
| O  | 0.014545  | -0.669505 | -1.941880 |
| Cl | -3.342378 | -1.229721 | 0.271636  |
| H  | -0.801442 | -0.920418 | 0.239992  |
| B  | -0.426636 | 0.817092  | 0.680882  |
| O  | -1.231758 | 1.422083  | -0.282062 |
| O  | -0.959592 | 0.958941  | 1.945222  |
| C  | -2.329829 | 1.873566  | 0.411742  |
| C  | -2.168707 | 1.583806  | 1.757248  |
| C  | -3.130032 | 1.887627  | 2.690535  |
| H  | -3.000354 | 1.645344  | 3.739449  |
| C  | -3.459490 | 2.481883  | -0.078949 |
| C  | -4.443014 | 2.798238  | 0.857197  |
| C  | -4.282314 | 2.508311  | 2.208726  |
| N  | 1.064774  | 0.706440  | 0.456748  |
| C  | 1.833561  | -0.351490 | 0.628634  |
| C  | 1.352423  | -1.540985 | 1.319249  |
| C  | 1.654676  | 1.979816  | 0.064806  |
| C  | 1.382237  | 2.535420  | -1.176126 |
| C  | 3.200229  | -0.383093 | 0.099552  |
| C  | 3.460998  | -0.048265 | -1.232814 |
| C  | 4.242046  | -0.799226 | 0.932123  |
| C  | 5.540485  | -0.822023 | 0.451600  |
| C  | 5.797412  | -0.478824 | -0.869177 |
| C  | 4.756163  | -0.110928 | -1.713842 |
| C  | 2.479140  | 2.618579  | 0.980660  |
| C  | 3.068833  | 3.823692  | 0.630652  |
| C  | 2.824095  | 4.381087  | -0.616921 |
| C  | 1.979348  | 3.740010  | -1.514079 |
| C  | 1.612535  | -2.792216 | 0.744319  |
| C  | 1.102055  | -3.936828 | 1.326601  |
| C  | 0.377171  | -3.850156 | 2.509537  |
| C  | 0.166466  | -2.618130 | 3.116125  |
| C  | 0.639519  | -1.462432 | 2.521304  |
| H  | 4.955224  | 0.126798  | -2.753610 |
| H  | 2.642070  | 0.214671  | -1.893843 |
| H  | 4.032531  | -1.074724 | 1.961758  |
| H  | 6.353387  | -1.117520 | 1.106666  |
| H  | 6.814384  | -0.509370 | -1.247590 |
| H  | -3.579024 | 2.687564  | -1.137096 |
| H  | -5.357029 | 3.276591  | 0.520454  |
| H  | -5.073037 | 2.766447  | 2.905738  |



|   |           |           |           |
|---|-----------|-----------|-----------|
| H | 2.659229  | 2.166590  | 1.952323  |
| H | 3.720539  | 4.327126  | 1.337320  |
| H | 3.289533  | 5.322884  | -0.889891 |
| H | 1.785540  | 4.177083  | -2.488255 |
| H | 0.732622  | 2.017849  | -1.873111 |
| H | 0.477548  | -0.502303 | 2.996551  |
| H | -0.374113 | -2.557492 | 4.054709  |
| H | -0.018075 | -4.751581 | 2.967337  |
| H | 1.266080  | -4.900329 | 0.855884  |
| H | 2.166359  | -2.851532 | -0.188211 |

#### 5 (PhCPh=NPh)

|    |           |           |           |
|----|-----------|-----------|-----------|
| Mo | -1.262887 | -1.695339 | -1.691949 |
| Cl | -2.002212 | 0.519042  | -2.374376 |
| O  | -1.112818 | -2.691392 | -3.030934 |
| O  | 0.299049  | -1.286255 | -1.157222 |
| Cl | -3.640168 | -1.942178 | -0.973903 |
| H  | -1.332470 | -2.858702 | -0.463173 |
| B  | -0.311723 | 1.265428  | 0.710458  |
| O  | -1.313945 | 0.338954  | 0.831510  |
| O  | -0.751526 | 2.555948  | 0.804430  |
| C  | -2.443727 | 1.094728  | 1.066909  |
| C  | -2.102597 | 2.438269  | 1.039897  |
| C  | -3.027766 | 3.436287  | 1.236927  |
| H  | -2.748305 | 4.483381  | 1.207089  |
| C  | -3.728346 | 0.669836  | 1.309394  |
| C  | -4.676169 | 1.670623  | 1.515163  |
| C  | -4.335843 | 3.020197  | 1.477391  |
| N  | 1.116525  | 0.970095  | 0.482816  |
| C  | 1.711519  | -0.112471 | 0.973852  |
| C  | 1.073798  | -0.804381 | 2.086488  |
| C  | 1.825376  | 1.922867  | -0.347802 |
| C  | 1.371771  | 2.169786  | -1.634609 |
| C  | 2.995631  | -0.595511 | 0.487490  |
| C  | 3.321498  | -0.603942 | -0.876982 |
| C  | 3.919758  | -1.086130 | 1.419816  |
| C  | 5.158592  | -1.538698 | 1.000431  |
| C  | 5.471160  | -1.542519 | -0.351615 |
| C  | 4.546841  | -1.088516 | -1.288024 |
| C  | 2.929042  | 2.581297  | 0.172881  |
| C  | 3.611454  | 3.483817  | -0.627904 |
| C  | 3.181662  | 3.728038  | -1.925804 |
| C  | 2.060864  | 3.077204  | -2.424791 |
| C  | 0.981910  | -2.199818 | 2.075878  |
| C  | 0.322136  | -2.850297 | 3.102909  |
| C  | -0.208295 | -2.122346 | 4.161418  |
| C  | -0.085644 | -0.738035 | 4.196799  |
| C  | 0.542390  | -0.076391 | 3.158434  |
| H  | 4.784665  | -1.117840 | -2.346058 |
| H  | 2.594619  | -0.278469 | -1.611046 |
| H  | 3.674919  | -1.081484 | 2.477223  |
| H  | 5.877912  | -1.896026 | 1.729516  |
| H  | 6.437960  | -1.909274 | -0.682321 |
| H  | -3.981489 | -0.383811 | 1.316523  |
| H  | -5.706428 | 1.387832  | 1.705214  |
| H  | -5.106071 | 3.767549  | 1.638091  |
| H  | 3.249211  | 2.380841  | 1.191306  |
| H  | 4.479716  | 4.001388  | -0.233129 |
| H  | 3.719541  | 4.434566  | -2.549903 |
| H  | 1.721641  | 3.270346  | -3.437137 |
| H  | 0.503427  | 1.638375  | -2.020785 |
| H  | 0.657249  | 1.004720  | 3.195287  |

|   |           |           |          |
|---|-----------|-----------|----------|
| H | -0.479298 | -0.175868 | 5.036843 |
| H | -0.716379 | -2.638718 | 4.969723 |
| H | 0.219536  | -3.929868 | 3.078794 |
| H | 1.386533  | -2.760610 | 1.239005 |

#### TS6 (PhCPh=NPh)

|    |           |           |           |
|----|-----------|-----------|-----------|
| Mo | -1.091215 | -1.156387 | -1.647385 |
| O  | -0.318280 | -2.031099 | -2.840944 |
| Cl | -3.413662 | -1.030599 | -2.135003 |
| Cl | -1.676389 | -2.818739 | 0.036791  |
| O  | -0.656533 | 0.474049  | -1.859775 |
| H  | 0.240704  | -1.115314 | -0.445716 |
| B  | -0.500783 | 1.308002  | 0.717069  |
| N  | 0.891989  | 0.955064  | 0.552942  |
| C  | 1.809226  | 2.006535  | 0.174958  |
| C  | 1.337356  | -0.341421 | 0.625240  |
| C  | 2.591969  | -0.670867 | -0.086241 |
| O  | -1.532375 | 0.391846  | 0.790745  |
| O  | -0.941600 | 2.605892  | 0.778851  |
| C  | -2.310031 | 2.503213  | 0.855086  |
| C  | -2.671338 | 1.164756  | 0.865038  |
| C  | -3.980660 | 0.754883  | 0.941023  |
| C  | -4.937611 | 1.767113  | 1.004358  |
| C  | -4.577633 | 3.111545  | 0.994790  |
| C  | -3.243710 | 3.510926  | 0.920874  |
| C  | 2.907705  | 2.241663  | 0.991342  |
| C  | 3.820582  | 3.224123  | 0.639719  |
| C  | 3.623750  | 3.976057  | -0.511042 |
| C  | 2.509348  | 3.748228  | -1.307985 |
| C  | 1.597096  | 2.759933  | -0.970244 |
| C  | 3.663093  | -1.224546 | 0.617688  |
| C  | 4.882828  | -1.423751 | -0.012092 |
| C  | 5.037165  | -1.090203 | -1.348584 |
| C  | 3.966973  | -0.558002 | -2.062672 |
| C  | 2.755109  | -0.343746 | -1.436752 |
| C  | 0.938481  | -1.169629 | 1.764645  |
| C  | 1.043412  | -2.564516 | 1.688755  |
| C  | 0.742857  | -3.346040 | 2.787793  |
| C  | 0.323874  | -2.748807 | 3.970337  |
| C  | 0.219742  | -1.365329 | 4.058043  |
| C  | 0.524602  | -0.577465 | 2.963252  |
| H  | -2.952284 | 4.555251  | 0.912495  |
| H  | 4.080468  | -0.313467 | -3.113667 |
| H  | 1.922063  | 0.069865  | -1.997403 |
| H  | 3.554550  | -1.462326 | 1.671127  |
| H  | 5.714723  | -1.838027 | 0.548034  |
| H  | 5.991297  | -1.248538 | -1.841531 |
| H  | -4.244829 | -0.296793 | 0.941029  |
| H  | -5.987244 | 1.497529  | 1.059484  |
| H  | -5.352666 | 3.869655  | 1.043637  |
| H  | 3.044665  | 1.648636  | 1.892358  |
| H  | 4.684944  | 3.405939  | 1.270509  |
| H  | 4.339430  | 4.744477  | -0.786077 |
| H  | 2.352875  | 4.335208  | -2.207435 |
| H  | 0.739775  | 2.550343  | -1.602432 |
| H  | 0.486591  | 0.504266  | 3.053254  |
| H  | -0.087797 | -0.899256 | 4.988271  |
| H  | 0.081169  | -3.364214 | 4.831130  |
| H  | 0.816630  | -4.426173 | 2.717738  |
| H  | 1.342017  | -3.028941 | 0.754055  |

#### 6 (PhCPh=NPh)



|                    |           |           |           |                    |           |           |           |
|--------------------|-----------|-----------|-----------|--------------------|-----------|-----------|-----------|
| C                  | -1.909359 | -2.136627 | -6.954220 | H                  | 0.561696  | -6.095109 | -2.099203 |
| C                  | -0.516344 | -2.056868 | -7.063511 | H                  | 2.876929  | -7.038331 | -2.123521 |
| C                  | 0.101963  | -1.410955 | -8.142279 | H                  | 4.427522  | -6.619992 | -0.266620 |
| C                  | -0.693412 | -0.842340 | -9.117793 | H                  | 3.733923  | -5.237111 | 1.697566  |
| C                  | -2.078200 | -0.918271 | -9.016275 |                    |           |           |           |
| C                  | -2.684163 | -1.560260 | -7.941499 | 5                  |           |           |           |
| C                  | 0.304706  | -2.636534 | -6.080467 | Mo                 | -0.179059 | 0.601729  | -0.545965 |
| N                  | 1.010222  | -3.100447 | -5.302963 | Cl                 | 0.332346  | 1.540631  | 1.623952  |
| B                  | 2.079686  | -3.658057 | -4.324974 | Cl                 | 2.303417  | 0.308838  | -0.582739 |
| O                  | 2.126475  | -5.080550 | -4.310546 | O                  | -0.933303 | 1.877856  | -1.350980 |
| C                  | 2.196712  | -5.412032 | -2.995069 | O                  | -1.269523 | -0.637210 | -0.222357 |
| C                  | 2.350598  | -6.661234 | -2.437424 | H                  | 0.314976  | -0.108068 | -2.012567 |
| C                  | 2.380442  | -6.734221 | -1.043000 | B                  | 1.141925  | 0.909394  | -4.098196 |
| C                  | 2.262387  | -5.594048 | -0.257500 | N                  | 1.536815  | 2.141613  | -3.429514 |
| C                  | 2.108723  | -4.329939 | -0.831296 | C                  | 1.770829  | 3.078128  | -2.799102 |
| C                  | 2.077416  | -4.267255 | -2.206015 | C                  | 2.044232  | 4.190857  | -2.006958 |
| O                  | 1.930871  | -3.171441 | -2.995350 | C                  | 1.843569  | 5.480901  | -2.525007 |
| O                  | 3.211702  | -0.863671 | -5.479732 | C                  | 2.096617  | 6.562080  | -1.708461 |
| Mo                 | 4.336534  | -2.047872 | -5.852213 | C                  | 2.533468  | 6.361182  | -0.401701 |
| Cl                 | 5.682654  | -1.058409 | -7.461783 | C                  | 2.726108  | 5.080449  | 0.105884  |
| Cl                 | 3.775930  | -3.800213 | -7.345754 | C                  | 2.487290  | 3.979438  | -0.689770 |
| O                  | 5.354232  | -2.279944 | -4.545071 | O                  | 1.966335  | -0.163956 | -4.201509 |
| H                  | -3.765345 | -1.610807 | -7.875706 | C                  | 1.201162  | -1.090092 | -4.876202 |
| H                  | -2.359315 | -2.643144 | -6.107550 | C                  | 1.526173  | -2.380185 | -5.224836 |
| H                  | 1.185117  | -1.364574 | -8.197579 | C                  | 0.545281  | -3.092517 | -5.910192 |
| H                  | -0.233629 | -0.337714 | -9.960242 | C                  | -0.689342 | -2.525960 | -6.220380 |
| H                  | -2.695680 | -0.468880 | -9.787456 | C                  | -1.006000 | -1.218145 | -5.861334 |
| H                  | 3.166112  | -3.203967 | -4.851302 | C                  | -0.028821 | -0.525587 | -5.185344 |
| H                  | 2.444176  | -7.544340 | -3.060656 | O                  | -0.064162 | 0.767344  | -4.708098 |
| H                  | 2.501034  | -7.702148 | -0.566574 | H                  | 1.951096  | 7.567650  | -2.086463 |
| H                  | 2.292630  | -5.683655 | 0.823909  | H                  | 1.498074  | 5.609716  | -3.544396 |
| H                  | 2.017827  | -3.432647 | -0.228199 | H                  | 2.619105  | 2.966799  | -0.317217 |
|                    |           |           |           | H                  | 3.060399  | 4.940501  | 1.127709  |
|                    |           |           |           | H                  | 2.724783  | 7.220329  | 0.233292  |
|                    |           |           |           | H                  | 2.488636  | -2.810944 | -4.974019 |
|                    |           |           |           | H                  | 0.748892  | -4.116123 | -6.206863 |
|                    |           |           |           | H                  | -1.426155 | -3.118700 | -6.752359 |
|                    |           |           |           | H                  | -1.964650 | -0.768624 | -6.093320 |
| <b>TS5 (PhC≡N)</b> |           |           |           | <b>TS6 (PhC≡N)</b> |           |           |           |
| Mo                 | 0.408220  | -0.558873 | 0.438042  | Mo                 | 0.580198  | -1.161197 | -1.451178 |
| O                  | 0.486350  | -0.567821 | 2.120558  | Cl                 | -1.702301 | -0.393238 | -0.953970 |
| O                  | 1.952813  | -0.593303 | -0.216678 | Cl                 | 0.285652  | 0.102392  | -3.454735 |
| Cl                 | -1.552636 | -1.289037 | -0.854376 | O                  | 1.945307  | -0.493895 | -0.732384 |
| Cl                 | -0.437605 | 1.630942  | -0.030429 | O                  | 0.925805  | -2.713789 | -1.990488 |
| H                  | 0.327917  | -2.298015 | 0.483652  | H                  | 0.090916  | -1.820971 | 0.097389  |
| B                  | -0.057700 | -3.860905 | 1.231009  | B                  | -2.859348 | -1.387518 | 1.527018  |
| N                  | -1.161996 | -3.300398 | 2.034200  | N                  | -1.663124 | -2.189449 | 1.629576  |
| C                  | -1.944942 | -2.706077 | 2.633277  | C                  | -0.620279 | -2.697563 | 1.499475  |
| C                  | -2.889758 | -1.934832 | 3.314045  | C                  | 0.400210  | -3.641540 | 1.776110  |
| C                  | -3.252120 | -2.259875 | 4.629204  | C                  | 1.749996  | -3.422092 | 1.487004  |
| C                  | -4.167835 | -1.456607 | 5.275989  | C                  | 2.675410  | -4.382444 | 1.843743  |
| C                  | -4.708343 | -0.352119 | 4.624224  | C                  | 2.259760  | -5.555535 | 2.463719  |
| C                  | -4.343804 | -0.035465 | 3.319688  | C                  | 0.915905  | -5.775094 | 2.744627  |
| C                  | -3.430793 | -0.822032 | 2.648390  | C                  | -0.024136 | -4.821026 | 2.410751  |
| O                  | -0.301969 | -4.553429 | 0.071281  | O                  | -2.974190 | -0.158369 | 2.110470  |
| C                  | 0.899458  | -5.163868 | -0.190806 | C                  | -4.262623 | 0.220566  | 1.813736  |
| C                  | 1.254871  | -5.919026 | -1.284424 | C                  | -4.902636 | 1.398260  | 2.121592  |
| C                  | 2.548013  | -6.437577 | -1.281728 | C                  | -6.223969 | 1.509828  | 1.693093  |
| C                  | 3.427534  | -6.200274 | -0.228493 | C                  | -6.854206 | 0.483360  | 0.994523  |
| C                  | 3.057216  | -5.431759 | 0.873265  | C                  | -6.194591 | -0.705699 | 0.689294  |
| C                  | 1.778052  | -4.925495 | 0.860026  | C                  | -4.891093 | -0.803145 | 1.116755  |
| O                  | 1.154130  | -4.153920 | 1.809730  |                    |           |           |           |
| H                  | -4.462140 | -1.687166 | 6.293659  |                    |           |           |           |
| H                  | -2.812279 | -3.122603 | 5.116530  |                    |           |           |           |
| H                  | -3.126665 | -0.592676 | 1.630560  |                    |           |           |           |
| H                  | -4.771837 | 0.829821  | 2.826423  |                    |           |           |           |
| H                  | -5.426007 | 0.274412  | 5.144021  |                    |           |           |           |

|   |           |           |          |
|---|-----------|-----------|----------|
| O | -4.011596 | -1.849240 | 0.958498 |
| H | 3.725888  | -4.220136 | 1.630391 |
| H | 2.061223  | -2.504779 | 1.000091 |
| H | -1.076769 | -4.970257 | 2.626705 |
| H | 0.600163  | -6.693762 | 3.226632 |
| H | 2.993036  | -6.310047 | 2.729960 |
| H | -4.400309 | 2.191457  | 2.663536 |
| H | -6.772436 | 2.421002  | 1.908522 |
| H | -7.883615 | 0.611421  | 0.676135 |
| H | -6.674018 | -1.510292 | 0.143375 |

### 6 (PhC≡N)

|    |           |           |           |
|----|-----------|-----------|-----------|
| Mo | 0.185668  | 0.342277  | -0.067988 |
| Cl | 0.828793  | 0.111776  | 2.084316  |
| Cl | 0.147545  | 2.506545  | -0.722694 |
| O  | 1.229643  | -0.516855 | -1.037334 |
| O  | -1.317880 | -0.338330 | -0.302600 |
| H  | -1.269532 | -3.275798 | 0.242563  |
| B  | -2.734099 | -1.642657 | 1.658103  |
| N  | -1.607438 | -2.390561 | 2.099217  |
| C  | -0.992291 | -3.176690 | 1.308162  |
| C  | 0.145591  | -4.000116 | 1.707454  |
| C  | 0.745977  | -4.831333 | 0.761329  |
| C  | 1.827144  | -5.624337 | 1.113424  |
| C  | 2.313710  | -5.586107 | 2.413344  |
| C  | 1.722587  | -4.755029 | 3.362205  |
| C  | 0.644121  | -3.964164 | 3.013089  |
| O  | -3.050459 | -0.384852 | 2.157170  |
| C  | -4.172058 | -0.002851 | 1.480060  |
| C  | -4.874431 | 1.177353  | 1.571750  |
| C  | -5.997273 | 1.301701  | 0.752858  |
| C  | -6.383229 | 0.280867  | -0.109990 |
| C  | -5.663969 | -0.911653 | -0.194399 |
| C  | -4.556976 | -1.022241 | 0.615702  |
| O  | -3.679157 | -2.061733 | 0.727926  |
| H  | 2.291620  | -6.271435 | 0.376172  |
| H  | 0.354181  | -4.850370 | -0.253059 |
| H  | 0.170227  | -3.305815 | 3.735729  |
| H  | 2.110846  | -4.728479 | 4.375660  |
| H  | 3.160876  | -6.205735 | 2.691998  |
| H  | -4.565203 | 1.966760  | 2.248390  |
| H  | -6.580676 | 2.216223  | 0.790524  |
| H  | -7.261374 | 0.413982  | -0.733941 |
| H  | -5.954252 | -1.713134 | -0.865175 |

### 3 (PhC=ONH<sub>2</sub>)

|    |           |           |           |
|----|-----------|-----------|-----------|
| Mo | -1.361874 | 0.989491  | 0.494637  |
| Cl | -3.441791 | 1.811592  | 0.840793  |
| Cl | 0.067796  | 1.509621  | 2.168036  |
| O  | -1.434500 | -0.663431 | 0.326026  |
| O  | -0.742048 | 1.586236  | -0.930078 |
| H  | 1.002809  | -0.616504 | -1.217942 |
| B  | 1.465817  | -0.733090 | -2.290467 |
| O  | -0.732385 | -0.663782 | -3.279814 |
| C  | -1.326242 | 0.391999  | -3.480921 |
| C  | -2.773828 | 0.534945  | -3.135611 |
| C  | -3.375801 | -0.513395 | -2.440110 |
| C  | -4.708827 | -0.437555 | -2.066848 |
| C  | -5.456690 | 0.688179  | -2.388496 |
| C  | -4.867316 | 1.735135  | -3.086500 |
| C  | -3.532369 | 1.661760  | -3.456125 |
| O  | 1.815196  | -1.946478 | -2.858593 |

|   |           |           |           |
|---|-----------|-----------|-----------|
| C | 2.417742  | -1.627256 | -4.040256 |
| C | 2.893459  | -2.464642 | -5.024148 |
| C | 3.474444  | -1.855926 | -6.138011 |
| C | 3.569092  | -0.471700 | -6.244349 |
| C | 3.086224  | 0.368038  | -5.239142 |
| C | 2.515829  | -0.245395 | -4.147079 |
| O | 1.969063  | 0.331502  | -3.033228 |
| N | -0.711232 | 1.457465  | -4.037578 |
| H | -5.166079 | -1.259317 | -1.524049 |
| H | -2.778456 | -1.386342 | -2.197255 |
| H | -3.103930 | 2.490155  | -4.013503 |
| H | -5.450175 | 2.613474  | -3.346405 |
| H | -6.501839 | 0.749289  | -2.099613 |
| H | 2.815248  | -3.543076 | -4.936225 |
| H | 3.859872  | -2.478799 | -6.939346 |
| H | 4.026755  | -0.034003 | -7.126028 |
| H | 3.157890  | 1.448785  | -5.308894 |
| H | -1.121315 | 2.378646  | -3.998827 |
| H | 0.299374  | 1.417225  | -4.088718 |

### TS4 (PhC=ONH<sub>2</sub>)

|    |           |           |           |
|----|-----------|-----------|-----------|
| Mo | -0.570130 | -0.233588 | 0.995876  |
| Cl | -1.867492 | -0.031586 | 2.833760  |
| Cl | 1.589778  | -0.659078 | 1.506694  |
| O  | -1.180398 | -1.444927 | 0.032524  |
| O  | -0.679563 | 1.166576  | 0.103135  |
| H  | 1.441707  | 0.015698  | -1.642461 |
| B  | 1.232847  | 0.389648  | -2.738728 |
| O  | -0.402786 | -1.107606 | -3.096714 |
| C  | -1.601129 | -0.948221 | -2.856519 |
| N  | -2.116426 | 0.249576  | -2.525456 |
| C  | -2.549103 | -2.095002 | -2.937929 |
| C  | -2.033460 | -3.380857 | -2.787486 |
| C  | -2.872415 | -4.481748 | -2.849482 |
| C  | -4.232822 | -4.307257 | -3.075681 |
| C  | -4.750658 | -3.029308 | -3.241007 |
| C  | -3.913454 | -1.925020 | -3.168471 |
| O  | 0.479695  | 1.533918  | -3.023480 |
| C  | 0.623560  | 1.716602  | -4.371435 |
| C  | 0.006420  | 2.638934  | -5.184945 |
| C  | 0.348539  | 2.607592  | -6.538722 |
| C  | 1.269650  | 1.688483  | -7.030454 |
| C  | 1.889041  | 0.758039  | -6.193332 |
| C  | 1.541275  | 0.793960  | -4.861830 |
| O  | 1.989741  | 0.010821  | -3.839727 |
| H  | -2.465495 | -5.480133 | -2.721004 |
| H  | -0.968742 | -3.501769 | -2.614556 |
| H  | -4.329940 | -0.933158 | -3.321642 |
| H  | -5.810422 | -2.891407 | -3.432804 |
| H  | -4.890194 | -5.170089 | -3.129339 |
| H  | 2.606575  | 0.036831  | -6.570330 |
| H  | 1.512332  | 1.690963  | -8.088652 |
| H  | -0.115097 | 3.315290  | -7.219071 |
| H  | -0.708410 | 3.353529  | -4.789933 |
| H  | -1.480318 | 1.032371  | -2.421644 |
| H  | -3.054215 | 0.341499  | -2.164069 |

### 4 (PhC=ONH<sub>2</sub>)

|   |           |          |           |
|---|-----------|----------|-----------|
| C | -6.344198 | 3.462657 | 2.067782  |
| C | -6.499272 | 2.076364 | 2.160647  |
| C | -6.716906 | 1.388947 | 0.988038  |
| C | -6.779184 | 2.048408 | -0.239033 |



|    |           |           |           |
|----|-----------|-----------|-----------|
| C  | 4.145438  | 1.307433  | 6.764354  |
| Cl | 3.830452  | -0.561943 | 1.782946  |
| Mo | 5.678872  | 0.293179  | 3.062945  |
| Cl | 7.074689  | -0.542765 | 1.359039  |
| O  | 6.123264  | -0.519582 | 4.459281  |
| O  | 6.131841  | 1.910719  | 3.186859  |
| H  | 4.166975  | 0.841779  | 3.877507  |
| H  | 1.487525  | -1.351399 | 7.658071  |
| H  | 1.370252  | -0.183176 | 5.487400  |
| H  | 4.926390  | 2.017600  | 6.505389  |
| H  | 5.014839  | 0.870402  | 8.669932  |
| H  | 3.302036  | -0.820606 | 9.257622  |
| H  | -0.511481 | 0.779443  | -0.714533 |
| H  | 0.216579  | 2.016102  | -2.759622 |
| H  | 2.145201  | 3.535924  | -2.695355 |
| H  | 3.431192  | 3.885654  | -0.580398 |
| H  | 3.460390  | 3.443727  | 3.568999  |
| H  | 4.109657  | 3.342440  | 5.155744  |

### 6 (PhC=ONH<sub>2</sub>)

|    |           |           |           |
|----|-----------|-----------|-----------|
| C  | 0.336713  | 1.748893  | 1.369239  |
| C  | 0.365354  | 0.375623  | 1.135620  |
| C  | 1.507165  | -0.205924 | 0.598554  |
| C  | 2.616082  | 0.575408  | 0.294763  |
| C  | 2.584131  | 1.942974  | 0.529330  |
| C  | 1.441714  | 2.528995  | 1.065107  |
| C  | -0.805148 | -0.479115 | 1.531558  |
| N  | -2.042523 | 0.021392  | 1.005786  |
| O  | -0.875286 | -0.443182 | 2.970679  |
| B  | -1.191523 | -1.517555 | 3.686731  |
| O  | -1.807653 | -2.672670 | 3.229068  |
| C  | -1.900929 | -3.486801 | 4.327082  |
| C  | -2.438130 | -4.749537 | 4.411001  |
| C  | -2.417478 | -5.354757 | 5.668844  |
| C  | -1.883363 | -4.706292 | 6.776518  |
| C  | -1.341596 | -3.422992 | 6.678396  |
| C  | -1.363115 | -2.839733 | 5.433058  |
| O  | -0.899262 | -1.601298 | 5.054398  |
| Cl | 1.715077  | -2.674980 | 3.593244  |
| Mo | 2.124326  | -1.017021 | 5.109487  |
| O  | 1.503090  | 0.437245  | 4.608407  |
| Cl | 1.588560  | -1.386094 | 7.282744  |
| O  | 3.774713  | -0.812509 | 5.076326  |
| H  | 3.506011  | 0.114036  | -0.123094 |
| H  | 1.531459  | -1.279508 | 0.423978  |
| H  | -0.550258 | 2.198975  | 1.806823  |
| H  | 1.417321  | 3.598465  | 1.252995  |
| H  | 3.450899  | 2.554878  | 0.297065  |
| H  | -0.932432 | -2.908140 | 7.540572  |
| H  | -1.888369 | -5.203993 | 7.741030  |
| H  | -2.831633 | -6.351656 | 5.782094  |
| H  | -2.857562 | -5.244300 | 3.541646  |
| H  | -2.764014 | -0.694696 | 1.016695  |
| H  | -1.927662 | 0.338025  | 0.047705  |
| H  | -0.598593 | -1.523675 | 1.245877  |

### 3 (Ph<sub>2</sub>S=O)

|   |           |          |          |
|---|-----------|----------|----------|
| C | -0.621286 | 3.250386 | 1.249845 |
| C | -0.101930 | 2.091141 | 1.809984 |
| C | -0.924727 | 1.136071 | 2.385238 |
| C | -2.299155 | 1.338501 | 2.382381 |
| C | -2.834799 | 2.484479 | 1.809614 |

|    |           |           |           |
|----|-----------|-----------|-----------|
| C  | -1.996193 | 3.438129  | 1.244889  |
| S  | 1.691647  | 1.798606  | 1.934002  |
| C  | 2.188060  | 2.400662  | 0.305507  |
| C  | 2.078048  | 1.583198  | -0.809613 |
| C  | 2.506076  | 2.072320  | -2.034699 |
| C  | 3.033327  | 3.355442  | -2.133254 |
| C  | 3.146644  | 4.156633  | -1.005434 |
| C  | 2.732658  | 3.674623  | 0.229677  |
| O  | 1.861312  | 0.296740  | 1.959741  |
| B  | 1.116108  | -1.814567 | 1.039225  |
| O  | 2.035050  | -2.482609 | 1.827999  |
| C  | 3.167269  | -2.549625 | 1.070397  |
| C  | 2.913259  | -2.011394 | -0.185626 |
| C  | 3.880918  | -1.941179 | -1.161185 |
| C  | 5.139038  | -2.447458 | -0.830367 |
| C  | 5.392437  | -2.993712 | 0.423399  |
| C  | 4.402624  | -3.054970 | 1.405661  |
| O  | 1.610244  | -1.602757 | -0.240960 |
| O  | -0.833151 | 0.441581  | -0.579881 |
| Mo | -2.182931 | -0.455496 | -0.943265 |
| Cl | -1.645211 | -1.896555 | -2.609262 |
| O  | -2.543865 | -1.334739 | 0.422594  |
| Cl | -3.914199 | 0.935398  | -1.424287 |
| H  | -0.010778 | -1.651258 | 1.330535  |
| H  | 2.426669  | 1.448899  | -2.920485 |
| H  | 1.665055  | 0.583905  | -0.715215 |
| H  | 2.833528  | 4.284158  | 1.124667  |
| H  | 3.569867  | 5.153207  | -1.082564 |
| H  | 3.365412  | 3.730062  | -3.096779 |
| H  | 3.668906  | -1.512564 | -2.135514 |
| H  | 5.934970  | -2.412709 | -1.567662 |
| H  | 6.382840  | -3.378193 | 0.646356  |
| H  | 4.592554  | -3.474626 | 2.387804  |
| H  | 0.029315  | 3.996315  | 0.801747  |
| H  | -2.413413 | 4.334476  | 0.796253  |
| H  | -3.909844 | 2.637595  | 1.805099  |
| H  | -2.952336 | 0.595878  | 2.830831  |
| H  | -0.494026 | 0.233718  | 2.808783  |

### TS4 (Ph<sub>2</sub>S=O)

|    |           |           |           |
|----|-----------|-----------|-----------|
| Mo | -0.108557 | 0.265374  | 0.013694  |
| Cl | -0.203908 | 0.316933  | 2.268976  |
| Cl | 2.044818  | 0.372798  | -0.670963 |
| O  | -0.964115 | 1.514585  | -0.670777 |
| O  | -0.790607 | -1.144866 | -0.555409 |
| B  | -3.886834 | 1.742720  | 1.378170  |
| O  | -5.187984 | 0.504903  | 0.955566  |
| S  | -4.976470 | -0.977139 | 0.649087  |
| C  | -3.708219 | -1.540846 | 1.827677  |
| C  | -3.881435 | -1.096203 | 3.133319  |
| C  | -3.019605 | -1.552948 | 4.117215  |
| C  | -2.006332 | -2.448237 | 3.800302  |
| C  | -1.847455 | -2.883324 | 2.493244  |
| C  | -2.704110 | -2.436234 | 1.495590  |
| O  | -4.114215 | 2.739274  | 0.397244  |
| C  | -4.895852 | 3.667034  | 1.010760  |
| C  | -5.035020 | 3.344150  | 2.360072  |
| C  | -5.766942 | 4.133625  | 3.216623  |
| C  | -6.368443 | 5.273981  | 2.678688  |
| C  | -6.229960 | 5.594349  | 1.335598  |
| C  | -5.483567 | 4.788173  | 0.472770  |
| O  | -4.349113 | 2.203073  | 2.633983  |

|                                |           |           |           |   |           |           |          |
|--------------------------------|-----------|-----------|-----------|---|-----------|-----------|----------|
| C                              | -4.105211 | -1.090907 | -0.922515 | H | -1.871258 | 0.328624  | 5.595157 |
| C                              | -3.605414 | 0.046169  | -1.536765 | H | -2.580032 | -1.729990 | 6.767564 |
| C                              | -2.983978 | -0.091976 | -2.771089 | H | -4.905586 | -2.547358 | 6.570751 |
| C                              | -2.881701 | -1.337026 | -3.374211 | H | -6.550485 | -1.273559 | 5.221933 |
| C                              | -3.419763 | -2.460504 | -2.759516 |   |           |           |          |
| C                              | -4.051071 | -2.338957 | -1.531989 |   |           |           |          |
| H                              | -2.909704 | 1.065495  | 1.308310  |   |           |           |          |
| H                              | -2.580538 | 0.788780  | -3.260595 |   |           |           |          |
| H                              | -3.711497 | 1.023899  | -1.075964 |   |           |           |          |
| H                              | -4.500120 | -3.206379 | -1.053322 |   |           |           |          |
| H                              | -3.360351 | -3.430140 | -3.242809 |   |           |           |          |
| H                              | -2.393369 | -1.432349 | -4.338770 |   |           |           |          |
| H                              | -5.365712 | 5.027268  | -0.578629 |   |           |           |          |
| H                              | -6.709590 | 6.486730  | 0.945896  |   |           |           |          |
| H                              | -6.955036 | 5.919247  | 3.325107  |   |           |           |          |
| H                              | -5.866372 | 3.872348  | 4.264711  |   |           |           |          |
| H                              | -2.554127 | -2.757599 | 0.470652  |   |           |           |          |
| H                              | -1.045453 | -3.569109 | 2.238307  |   |           |           |          |
| H                              | -1.331088 | -2.799297 | 4.574056  |   |           |           |          |
| H                              | -3.136621 | -1.197632 | 5.135676  |   |           |           |          |
| H                              | -4.649904 | -0.365022 | 3.366112  |   |           |           |          |
| <b>4 (Ph<sub>2</sub>S=O)</b>   |           |           |           |   |           |           |          |
| C                              | -5.522554 | -0.932606 | 5.304587  |   |           |           |          |
| C                              | -5.107436 | 0.229858  | 4.663152  |   |           |           |          |
| C                              | -3.800082 | 0.698677  | 4.750959  |   |           |           |          |
| C                              | -2.895385 | -0.019476 | 5.511441  |   |           |           |          |
| C                              | -3.297228 | -1.177901 | 6.168344  |   |           |           |          |
| C                              | -4.601983 | -1.638990 | 6.061845  |   |           |           |          |
| S                              | -6.414621 | 1.129090  | 3.859132  |   |           |           |          |
| O                              | -6.872845 | 2.308086  | 4.825478  |   |           |           |          |
| B                              | -6.105567 | 2.900031  | 5.961208  |   |           |           |          |
| O                              | -6.873622 | 3.952664  | 6.547401  |   |           |           |          |
| C                              | -6.976906 | 3.641721  | 7.863317  |   |           |           |          |
| C                              | -6.310100 | 2.444096  | 8.126696  |   |           |           |          |
| C                              | -6.256760 | 1.910458  | 9.393570  |   |           |           |          |
| C                              | -6.907165 | 2.615407  | 10.411407 |   |           |           |          |
| C                              | -7.570458 | 3.806436  | 10.149897 |   |           |           |          |
| C                              | -7.614264 | 4.344608  | 8.859508  |   |           |           |          |
| O                              | -5.765707 | 1.955016  | 6.985243  |   |           |           |          |
| C                              | -5.587792 | 1.991265  | 2.518395  |   |           |           |          |
| C                              | -5.927562 | 3.313408  | 2.281381  |   |           |           |          |
| C                              | -5.361037 | 3.953111  | 1.188191  |   |           |           |          |
| C                              | -4.497675 | 3.266608  | 0.347187  |   |           |           |          |
| C                              | -4.196961 | 1.931323  | 0.586127  |   |           |           |          |
| C                              | -4.747566 | 1.274665  | 1.675225  |   |           |           |          |
| O                              | -5.194831 | 5.560841  | 4.428462  |   |           |           |          |
| Mo                             | -3.810548 | 4.847314  | 5.040033  |   |           |           |          |
| Cl                             | -2.300783 | 6.613460  | 5.117135  |   |           |           |          |
| O                              | -3.170982 | 3.823382  | 3.877545  |   |           |           |          |
| Cl                             | -3.382753 | 4.324525  | 7.301335  |   |           |           |          |
| H                              | -5.001048 | 3.357330  | 5.424534  |   |           |           |          |
| H                              | -5.598791 | 4.994954  | 0.999284  |   |           |           |          |
| H                              | -6.603478 | 3.843196  | 2.943754  |   |           |           |          |
| H                              | -4.509984 | 0.231978  | 1.865398  |   |           |           |          |
| H                              | -3.525971 | 1.394754  | -0.076475 |   |           |           |          |
| H                              | -4.057054 | 3.773270  | -0.505414 |   |           |           |          |
| H                              | -8.125745 | 5.277565  | 8.645579  |   |           |           |          |
| H                              | -8.064118 | 4.334299  | 10.960226 |   |           |           |          |
| H                              | -6.888170 | 2.223109  | 11.423657 |   |           |           |          |
| H                              | -5.730891 | 0.980442  | 9.584952  |   |           |           |          |
| H                              | -3.488424 | 1.599905  | 4.233300  |   |           |           |          |
| <b>TS5 (Ph<sub>2</sub>S=O)</b> |           |           |           |   |           |           |          |
| Mo                             | -0.009144 | -0.142161 | 0.119642  |   |           |           |          |
| Cl                             | 0.181217  | -0.217813 | 2.506839  |   |           |           |          |
| O                              | 1.422745  | -0.086702 | -0.750576 |   |           |           |          |
| O                              | -1.212806 | -0.773290 | -0.862407 |   |           |           |          |
| Cl                             | -0.660785 | 2.110294  | 0.321657  |   |           |           |          |
| H                              | 0.391964  | -1.914113 | 0.524695  |   |           |           |          |
| B                              | 0.075748  | -3.249622 | 0.855584  |   |           |           |          |
| O                              | 0.525589  | -4.008602 | -0.305320 |   |           |           |          |
| S                              | 2.016213  | -4.204621 | -0.853343 |   |           |           |          |
| C                              | 2.118105  | -2.974640 | -2.154974 |   |           |           |          |
| C                              | 0.945828  | -2.509619 | -2.728288 |   |           |           |          |
| C                              | 1.042205  | -1.636658 | -3.802351 |   |           |           |          |
| C                              | 2.285377  | -1.265597 | -4.293078 |   |           |           |          |
| C                              | 3.447134  | -1.767053 | -3.718936 |   |           |           |          |
| C                              | 3.374229  | -2.637440 | -2.643211 |   |           |           |          |
| C                              | 3.147439  | -3.619259 | 0.383251  |   |           |           |          |
| C                              | 3.672028  | -4.618116 | 1.198310  |   |           |           |          |
| C                              | 4.464342  | -4.248919 | 2.272441  |   |           |           |          |
| C                              | 4.710991  | -2.905018 | 2.518083  |   |           |           |          |
| C                              | 4.191446  | -1.920209 | 1.684186  |   |           |           |          |
| C                              | 3.402196  | -2.268529 | 0.603167  |   |           |           |          |
| O                              | -1.325780 | -3.327550 | 1.033588  |   |           |           |          |
| C                              | -1.503630 | -3.485411 | 2.373144  |   |           |           |          |
| C                              | -0.267074 | -3.586439 | 3.007621  |   |           |           |          |
| C                              | -0.161298 | -3.738382 | 4.370084  |   |           |           |          |
| C                              | -1.354458 | -3.792950 | 5.095374  |   |           |           |          |
| C                              | -2.587539 | -3.692209 | 4.463945  |   |           |           |          |
| C                              | -2.683564 | -3.533764 | 3.078735  |   |           |           |          |
| O                              | 0.731844  | -3.500000 | 2.088449  |   |           |           |          |
| H                              | 0.135176  | -1.245241 | -4.251164 |   |           |           |          |
| H                              | -0.023124 | -2.800222 | -2.337685 |   |           |           |          |
| H                              | 4.280892  | -3.030148 | -2.192510 |   |           |           |          |
| H                              | 4.418325  | -1.478361 | -4.106753 |   |           |           |          |
| H                              | 2.351732  | -0.581514 | -5.132827 |   |           |           |          |
| H                              | -3.641280 | -3.446434 | 2.576417  |   |           |           |          |
| H                              | -3.496835 | -3.733421 | 5.055570  |   |           |           |          |
| H                              | -1.313898 | -3.911950 | 6.173751  |   |           |           |          |
| H                              | 0.808619  | -3.806644 | 4.852106  |   |           |           |          |
| H                              | 3.001854  | -1.505407 | -0.056277 |   |           |           |          |
| H                              | 4.397362  | -0.873325 | 1.880059  |   |           |           |          |
| H                              | 5.323385  | -2.618743 | 3.367287  |   |           |           |          |
| H                              | 4.883323  | -5.010780 | 2.920790  |   |           |           |          |
| H                              | 3.455776  | -5.664420 | 1.003168  |   |           |           |          |
| <b>5 (Ph<sub>2</sub>S=O)</b>   |           |           |           |   |           |           |          |
| C                              | 5.104442  | -1.264796 | -3.623261 |   |           |           |          |
| C                              | 4.007956  | -0.702679 | -2.982516 |   |           |           |          |
| C                              | 4.094413  | -0.064297 | -1.752569 |   |           |           |          |
| C                              | 5.338442  | -0.002937 | -1.144939 |   |           |           |          |
| C                              | 6.449386  | -0.570601 | -1.757153 |   |           |           |          |
| C                              | 6.335361  | -1.200127 | -2.989013 |   |           |           |          |
| S                              | 2.463021  | -0.856965 | -3.849663 |   |           |           |          |
| C                              | 1.675784  | -2.275914 | -3.155633 |   |           |           |          |
| C                              | 1.858986  | -2.671828 | -1.833328 |   |           |           |          |
| C                              | 1.167251  | -3.781185 | -1.384749 |   |           |           |          |
| C                              | 0.314882  | -4.469598 | -2.242958 |   |           |           |          |





|                        |           |           |           |                        |           |           |           |
|------------------------|-----------|-----------|-----------|------------------------|-----------|-----------|-----------|
| Cl                     | -0.639166 | -1.683695 | -0.251597 | Cl                     | 3.148088  | -1.407357 | 1.777668  |
| Mo                     | 1.531563  | -1.105437 | -0.095116 | Cl                     | 3.738228  | -0.401288 | -1.233429 |
| O                      | 2.009854  | -1.397388 | 1.547281  | H                      | -3.545914 | 1.372686  | -2.669787 |
| B                      | 3.701806  | -1.033677 | 1.243512  | H                      | -5.880830 | 0.607384  | -2.209177 |
| O                      | 4.021575  | 0.108449  | 1.984648  | H                      | -6.312701 | -1.603585 | -1.232747 |
| C                      | 4.825004  | -0.356268 | 2.983988  | H                      | -4.426464 | -3.144767 | -0.661904 |
| C                      | 5.073847  | -1.715062 | 2.793112  | H                      | -2.854457 | 0.245607  | 0.883318  |
| C                      | 5.867922  | -2.436393 | 3.655857  | H                      | -4.073315 | -1.512796 | 2.102062  |
| C                      | 6.415213  | -1.739474 | 4.733090  | H                      | -2.873406 | -2.987822 | 3.692209  |
| C                      | 6.169993  | -0.381512 | 4.921246  | H                      | -0.442610 | -2.683562 | 4.063828  |
| C                      | 5.363749  | 0.340819  | 4.041811  | H                      | 0.789936  | -0.942922 | 2.822580  |
| O                      | 1.558208  | 0.528051  | -0.366372 | C                      | 1.554161  | 1.668593  | -0.240075 |
| Cl                     | 2.265258  | -2.359462 | -1.861600 | C                      | -0.888312 | 2.114098  | 0.993759  |
| O                      | 4.440766  | -2.144516 | 1.663374  | H                      | 0.949125  | -1.962085 | 0.892920  |
| H                      | 3.566718  | -0.889501 | 0.008264  | C                      | 2.370171  | 2.457130  | 0.561304  |
| H                      | 6.055088  | -3.493497 | 3.500699  | C                      | 3.086948  | 3.501946  | -0.004989 |
| H                      | 7.046646  | -2.269325 | 5.439463  | C                      | 2.988072  | 3.762001  | -1.364662 |
| H                      | 6.614778  | 0.127775  | 5.770450  | C                      | 2.167556  | 2.970580  | -2.159624 |
| H                      | 5.166750  | 1.398724  | 4.178416  | C                      | 1.455482  | 1.919818  | -1.603514 |
| <b>Im7</b>             |           |           |           | H                      | 2.445005  | 2.238141  | 1.623426  |
| Cl                     | -4.259038 | -2.387358 | -0.633056 | H                      | 3.726084  | 4.115370  | 0.622924  |
| Mo                     | -3.035453 | -0.448763 | -1.008479 | H                      | 3.549579  | 4.579496  | -1.806092 |
| H                      | -4.473282 | -0.226061 | -1.808539 | H                      | 2.084369  | 3.170387  | -3.223754 |
| O                      | -3.193346 | 0.212788  | 0.491060  | H                      | 0.822205  | 1.288735  | -2.221822 |
| Cl                     | -1.095574 | -1.616953 | -1.479767 | C                      | -1.047195 | 2.776039  | 2.209281  |
| O                      | -2.681649 | 1.099536  | -2.032790 | C                      | -1.686729 | 4.005687  | 2.251639  |
| B                      | -3.042957 | 1.775430  | -3.147539 | C                      | -2.205910 | 4.560249  | 1.089013  |
| O                      | -2.526893 | 3.007882  | -3.481795 | C                      | -2.076433 | 3.887544  | -0.118872 |
| O                      | -3.959385 | 1.318785  | -4.072326 | C                      | -1.410391 | 2.672176  | -0.171753 |
| C                      | -4.020015 | 2.310723  | -5.015536 | H                      | -0.658489 | 2.327739  | 3.120464  |
| C                      | -3.144162 | 3.331077  | -4.660623 | H                      | -1.790216 | 4.527453  | 3.197953  |
| C                      | -2.986586 | 4.459409  | -5.432033 | H                      | -2.718730 | 5.516474  | 1.125772  |
| C                      | -3.758979 | 4.529334  | -6.590019 | H                      | -2.493271 | 4.312032  | -1.027229 |
| C                      | -4.638544 | 3.508792  | -6.943276 | H                      | -1.309350 | 2.143130  | -1.115099 |
| C                      | -4.788554 | 2.369244  | -6.154987 | <b>TS9 (PhCPh=NPh)</b> |           |           |           |
| H                      | -5.468880 | 1.567893  | -6.420968 | Mo                     | -0.060266 | -1.010319 | -0.601210 |
| H                      | -5.221415 | 3.601020  | -7.853921 | Cl                     | 1.349299  | -2.839282 | -1.646495 |
| H                      | -3.672023 | 5.400955  | -7.230539 | Cl                     | -1.706949 | -2.767480 | -0.743303 |
| H                      | -2.299974 | 5.248503  | -5.146722 | O                      | -0.324802 | -0.203197 | -2.009739 |
| <b>Im8 (PhCPh=NPh)</b> |           |           |           | O                      | -1.395194 | -0.298787 | 0.666556  |
| C                      | -2.731757 | -0.473375 | -1.919603 | N                      | 0.961425  | 0.453431  | 0.476648  |
| C                      | -2.974671 | -1.723770 | -1.364357 | H                      | 1.678268  | -0.964643 | -0.825988 |
| C                      | -4.249264 | -2.170043 | -1.103345 | C                      | 2.252529  | 0.143824  | 0.176098  |
| C                      | -5.288959 | -1.297049 | -1.421801 | C                      | 2.883550  | -0.961074 | 0.927077  |
| C                      | -5.044407 | -0.043476 | -1.976114 | C                      | 3.979309  | -1.655543 | 0.401146  |
| C                      | -3.747601 | 0.397088  | -2.240109 | C                      | 4.515196  | -2.726455 | 1.092185  |
| O                      | -1.782570 | -2.350837 | -1.118772 | C                      | 3.961613  | -3.117408 | 2.306245  |
| B                      | -0.822790 | -1.442483 | -1.511641 | C                      | 2.869103  | -2.437240 | 2.831061  |
| O                      | -1.376297 | -0.285194 | -2.027283 | C                      | 2.321829  | -1.368688 | 2.142173  |
| O                      | 0.506522  | -1.661841 | -1.410646 | B                      | -2.704657 | -0.158043 | 0.481829  |
| Mo                     | 2.039131  | -1.728278 | -0.333031 | O                      | -3.286219 | 0.342318  | -0.687120 |
| O                      | 2.513993  | -3.300698 | -0.504027 | C                      | -4.626768 | 0.366414  | -0.439099 |
| N                      | 0.881317  | 0.550598  | 0.345101  | C                      | -4.863697 | -0.093329 | 0.853125  |
| C                      | -0.219813 | 0.782384  | 0.971760  | C                      | -6.135068 | -0.170666 | 1.372573  |
| C                      | -0.935946 | -0.272031 | 1.726390  | C                      | -7.180719 | 0.231103  | 0.538753  |
| C                      | -0.269992 | -1.090801 | 2.641166  | C                      | -6.943333 | 0.687868  | -0.752505 |
| C                      | -0.967520 | -2.059147 | 3.347750  | C                      | -5.648672 | 0.764201  | -1.269181 |
| C                      | -2.330829 | -2.224024 | 3.143605  | O                      | -3.677806 | -0.418527 | 1.444784  |
| C                      | -3.004363 | -1.397566 | 2.253481  | C                      | 0.577997  | 1.767660  | 0.818412  |
| C                      | -2.316608 | -0.411666 | 1.563627  | C                      | 1.295795  | 2.400868  | 1.835201  |
|                        |           |           |           | C                      | 0.980702  | 3.698349  | 2.205234  |

|   |           |           |           |   |           |           |           |
|---|-----------|-----------|-----------|---|-----------|-----------|-----------|
| C | -0.055010 | 4.373133  | 1.574137  | H | -1.129274 | -0.535788 | -1.845650 |
| C | -0.770561 | 3.740479  | 0.565063  | C | -1.480385 | -2.396551 | -0.942118 |
| C | -0.461045 | 2.445288  | 0.182967  | C | -0.258580 | -0.256455 | 2.514810  |
| C | 3.082861  | 1.086544  | -0.594916 | C | -0.431691 | -0.703971 | 3.812895  |
| C | 4.390966  | 1.378857  | -0.197217 | C | -1.488811 | -1.548977 | 4.126235  |
| C | 5.127989  | 2.330442  | -0.882309 | C | -2.379873 | -1.940310 | 3.136166  |
| C | 4.577812  | 2.979178  | -1.979081 | C | -2.212957 | -1.514531 | 1.828361  |
| C | 3.281202  | 2.685974  | -2.387641 | H | 0.566799  | 0.399601  | 2.254846  |
| C | 2.532847  | 1.753511  | -1.694816 | H | 0.263579  | -0.387751 | 4.583845  |
| H | -6.310017 | -0.529380 | 2.381353  | H | -1.624398 | -1.894690 | 5.146096  |
| H | -8.200017 | 0.184172  | 0.909074  | H | -3.223755 | -2.577045 | 3.381443  |
| H | -7.780130 | 0.990108  | -1.374410 | H | -2.931604 | -1.795786 | 1.068130  |
| H | -5.450463 | 1.117792  | -2.275540 | C | -2.732025 | -2.462473 | -1.551068 |
| H | 1.521908  | 1.522687  | -2.016419 | C | -3.477288 | -3.630876 | -1.500314 |
| H | 2.854157  | 3.187394  | -3.249880 | C | -2.973653 | -4.746090 | -0.844256 |
| H | 5.161124  | 3.718096  | -2.519736 | C | -1.718007 | -4.692910 | -0.253100 |
| H | 6.135539  | 2.567941  | -0.556781 | C | -0.971373 | -3.525264 | -0.304753 |
| H | 4.817179  | 0.888388  | 0.672003  | H | -3.128851 | -1.586330 | -2.057306 |
| H | 2.097374  | 1.863768  | 2.337192  | H | -4.451676 | -3.670437 | -1.977233 |
| H | 1.545875  | 4.180851  | 2.996793  | H | -3.555580 | -5.661831 | -0.802890 |
| H | -0.304902 | 5.388168  | 1.866294  | H | -1.315492 | -5.567076 | 0.249190  |
| H | -1.578377 | 4.262694  | 0.061570  | H | 0.009545  | -3.494142 | 0.160993  |
| H | -1.021484 | 1.970072  | -0.615260 |   |           |           |           |
| H | 4.384559  | -1.371521 | -0.565468 |   |           |           |           |
| H | 5.356734  | -3.270584 | 0.676558  |   |           |           |           |
| H | 4.382011  | -3.961390 | 2.844201  |   |           |           |           |
| H | 2.442564  | -2.742844 | 3.780865  |   |           |           |           |
| H | 1.466250  | -0.831402 | 2.541346  |   |           |           |           |

#### Im9 (PhCPh=NPh)

|    |           |           |           |
|----|-----------|-----------|-----------|
| C  | 4.001498  | 1.504646  | -0.210276 |
| C  | 3.482034  | 1.324507  | 1.067071  |
| C  | 4.274501  | 0.978361  | 2.136905  |
| C  | 5.637114  | 0.818932  | 1.878150  |
| C  | 6.158667  | 1.003416  | 0.601716  |
| C  | 5.343207  | 1.354005  | -0.475195 |
| O  | 2.128214  | 1.512554  | 1.030030  |
| B  | 1.832379  | 1.763051  | -0.312078 |
| O  | 2.991094  | 1.801840  | -1.076812 |
| O  | 0.605578  | 1.964092  | -0.790367 |
| Mo | -1.242801 | 1.635660  | -0.300535 |
| O  | -1.442475 | 2.432280  | 1.119710  |
| N  | -0.952949 | -0.191360 | 0.192264  |
| C  | -0.721140 | -1.092908 | -0.985709 |
| C  | 0.765974  | -1.236205 | -1.239268 |
| C  | 1.691650  | -1.486695 | -0.227152 |
| C  | 3.036376  | -1.648608 | -0.536070 |
| C  | 3.466222  | -1.566882 | -1.853237 |
| C  | 2.548635  | -1.315810 | -2.864092 |
| C  | 1.207922  | -1.142884 | -2.557063 |
| Cl | -3.568753 | 1.009808  | -0.669180 |
| Cl | -1.682457 | 3.156298  | -2.084420 |
| H  | 5.738057  | 1.490705  | -1.476338 |
| H  | 7.223377  | 0.871536  | 0.437138  |
| H  | 6.301474  | 0.545682  | 2.691758  |
| H  | 3.856830  | 0.835549  | 3.128012  |
| H  | 0.490904  | -0.933937 | -3.347686 |
| H  | 2.878179  | -1.242131 | -3.895847 |
| H  | 4.519240  | -1.688229 | -2.089301 |
| H  | 3.751726  | -1.838696 | 0.259401  |
| H  | 1.370742  | -1.560570 | 0.808253  |
| C  | -1.136160 | -0.680101 | 1.514736  |

#### TS10 (PhCPh=NPh)

|    |           |           |           |
|----|-----------|-----------|-----------|
| Mo | -0.443892 | 0.191812  | 0.798868  |
| Cl | -2.112216 | 0.553753  | 2.359667  |
| Cl | 1.300895  | 0.220282  | 2.261109  |
| O  | -0.766536 | -1.407117 | 0.547005  |
| O  | 0.548465  | 0.607970  | -0.735106 |
| N  | -1.712912 | 1.317237  | -0.588194 |
| B  | -0.339079 | 0.720435  | -1.825641 |
| C  | -1.422757 | 2.807085  | -0.514534 |
| C  | -1.261793 | 3.307021  | 0.911684  |
| C  | 0.027330  | 3.262246  | 1.444986  |
| C  | 0.278804  | 3.625457  | 2.764996  |
| C  | -0.758490 | 4.066440  | 3.565682  |
| C  | -2.040797 | 4.162677  | 3.031885  |
| C  | -2.291091 | 3.788697  | 1.723829  |
| O  | -0.781729 | -0.461551 | -2.470958 |
| C  | -1.035491 | -0.097759 | -3.754720 |
| C  | -0.620217 | 1.217478  | -3.958776 |
| C  | -0.759538 | 1.840961  | -5.177526 |
| C  | -1.339763 | 1.093712  | -6.204567 |
| C  | -1.760079 | -0.216032 | -5.999201 |
| C  | -1.615828 | -0.839650 | -4.758318 |
| O  | -0.116250 | 1.720333  | -2.800395 |
| C  | -3.074208 | 0.870470  | -0.594104 |
| C  | -3.349301 | -0.453221 | -0.959205 |
| C  | -4.646891 | -0.932898 | -0.970083 |
| C  | -5.708777 | -0.113261 | -0.610864 |
| C  | -5.448850 | 1.197041  | -0.242858 |
| C  | -4.150997 | 1.683894  | -0.231703 |
| C  | -2.238587 | 3.686297  | -1.448778 |
| C  | -2.841838 | 3.204591  | -2.610103 |
| C  | -3.469102 | 4.066379  | -3.497693 |
| C  | -3.502634 | 5.431146  | -3.248693 |
| C  | -2.893942 | 5.924896  | -2.105083 |
| C  | -2.267104 | 5.061481  | -1.216785 |
| H  | -0.442934 | 2.868984  | -5.320926 |
| H  | -1.467481 | 1.548384  | -7.181970 |
| H  | -2.211466 | -0.766355 | -6.818754 |
| H  | -1.940287 | -1.860795 | -4.586655 |

|                    |           |           |           |                     |           |           |           |
|--------------------|-----------|-----------|-----------|---------------------|-----------|-----------|-----------|
| H                  | -1.784768 | 5.471079  | -0.334183 | C                   | -2.146628 | -4.064972 | -2.458119 |
| H                  | -2.901007 | 6.990966  | -1.898000 | C                   | -3.260710 | -3.239845 | -2.551241 |
| H                  | -3.995364 | 6.104408  | -3.943575 | C                   | -4.323351 | -3.534331 | -3.372781 |
| H                  | -3.931131 | 3.660089  | -4.393092 | C                   | -4.224961 | -4.712873 | -4.112321 |
| H                  | -2.842772 | 2.143990  | -2.837757 | C                   | -3.109154 | -5.539740 | -4.018980 |
| H                  | -0.410786 | 2.884302  | -0.926994 | C                   | -2.038410 | -5.230369 | -3.180624 |
| H                  | -2.541250 | -1.119088 | -1.232983 | O                   | -3.082439 | -2.148291 | -1.737895 |
| H                  | -4.826067 | -1.963666 | -1.260305 | C                   | -1.407364 | -0.762138 | -4.181891 |
| H                  | -6.725405 | -0.493142 | -0.616589 | C                   | -2.581151 | -0.027693 | -4.330432 |
| H                  | -6.262267 | 1.858086  | 0.040156  | C                   | -3.418483 | -0.289120 | -5.401136 |
| H                  | -3.993569 | 2.717140  | 0.037617  | C                   | -3.092611 | -1.293639 | -6.304532 |
| H                  | 0.863943  | 2.986493  | 0.804999  | C                   | -1.927830 | -2.036429 | -6.145417 |
| H                  | 1.291379  | 3.570601  | 3.153266  | C                   | -1.077393 | -1.774641 | -5.085908 |
| H                  | -0.572898 | 4.355306  | 4.595428  | H                   | -1.162474 | -5.864877 | -3.103300 |
| H                  | -2.856041 | 4.532645  | 3.646307  | H                   | -3.069056 | -6.447665 | -4.612142 |
| H                  | -3.300487 | 3.890598  | 1.341543  | H                   | -5.038352 | -4.989425 | -4.775405 |
|                    |           |           |           | H                   | -5.186195 | -2.880536 | -3.438338 |
|                    |           |           |           | H                   | -0.165099 | -2.345580 | -4.939939 |
|                    |           |           |           | H                   | -1.683662 | -2.824743 | -6.850068 |
|                    |           |           |           | H                   | -3.755320 | -1.503560 | -7.138379 |
|                    |           |           |           | H                   | -4.329928 | 0.285442  | -5.528542 |
|                    |           |           |           | H                   | -2.830253 | 0.745857  | -3.606899 |
| <b>Im8 (PhC≡N)</b> |           |           |           | <b>Im9 (PhC≡N)</b>  |           |           |           |
| C                  | 0.682081  | 4.215110  | 0.451732  | C                   | 3.451099  | -0.852974 | 0.423752  |
| C                  | 0.025142  | 4.065111  | 1.666860  | C                   | 2.161066  | -1.321908 | 0.648121  |
| C                  | -1.003639 | 4.893265  | 2.049895  | C                   | 1.136175  | -1.095376 | -0.241473 |
| C                  | -1.359568 | 5.896865  | 1.148515  | C                   | 1.458627  | -0.377020 | -1.394331 |
| C                  | -0.705225 | 6.044834  | -0.070674 | C                   | 2.750238  | 0.086989  | -1.622216 |
| C                  | 0.339782  | 5.199615  | -0.445729 | C                   | 3.779669  | -0.144046 | -0.708923 |
| O                  | 0.584580  | 3.019699  | 2.356582  | O                   | 2.120989  | -1.967479 | 1.854230  |
| B                  | 1.597127  | 2.563838  | 1.534995  | B                   | 3.417660  | -1.869235 | 2.363326  |
| O                  | 1.669428  | 3.268410  | 0.350811  | O                   | 4.249369  | -1.195513 | 1.476942  |
| O                  | 2.447274  | 1.558942  | 1.845486  | O                   | 3.803740  | -2.338652 | 3.548641  |
| Mo                 | 3.436773  | 0.826566  | 3.276524  | Mo                  | 3.006813  | -2.299111 | 5.326223  |
| O                  | 3.227447  | -0.783476 | 2.968298  | O                   | 1.816213  | -3.432143 | 5.309460  |
| N                  | 3.352272  | 3.236172  | 3.872023  | N                   | 2.042554  | -0.738025 | 5.079749  |
| C                  | 2.909628  | 4.298176  | 3.931443  | C                   | 1.704670  | 0.460779  | 5.342032  |
| C                  | 2.314572  | 5.586602  | 3.944599  | C                   | 1.411796  | 1.483575  | 4.377768  |
| C                  | 1.586315  | 6.008941  | 5.059476  | C                   | 1.375050  | 1.193535  | 3.005807  |
| C                  | 0.956094  | 7.240148  | 5.022941  | C                   | 1.163355  | 2.207633  | 2.097873  |
| C                  | 1.047074  | 8.036799  | 3.887570  | C                   | 0.986972  | 3.514486  | 2.552675  |
| C                  | 1.771150  | 7.611847  | 2.779788  | C                   | 1.009270  | 3.807601  | 3.911633  |
| C                  | 2.409095  | 6.384587  | 2.800179  | C                   | 1.217448  | 2.794773  | 4.829448  |
| Cl                 | 3.916086  | 0.588565  | 5.559134  | Cl                  | 3.018311  | -1.649171 | 7.689455  |
| Cl                 | 5.632034  | 1.476465  | 2.790741  | Cl                  | 4.934424  | -3.552224 | 5.957841  |
| H                  | 0.858037  | 5.307866  | -1.392106 | H                   | 4.789129  | 0.215735  | -0.875815 |
| H                  | -1.013417 | 6.834841  | -0.747932 | H                   | 2.964902  | 0.640695  | -2.530660 |
| H                  | -2.167108 | 6.574927  | 1.405519  | H                   | 0.683465  | -0.178045 | -2.127436 |
| H                  | -1.503833 | 4.768665  | 3.004190  | H                   | 0.132670  | -1.461190 | -0.052223 |
| H                  | 2.975975  | 6.033956  | 1.942956  | H                   | 1.246880  | 3.004224  | 5.894782  |
| H                  | 1.835203  | 8.237163  | 1.895573  | H                   | 0.865222  | 4.827677  | 4.250561  |
| H                  | 0.547404  | 9.000191  | 3.865559  | H                   | 0.825138  | 4.313190  | 1.835440  |
| H                  | 0.389327  | 7.580150  | 5.883102  | H                   | 1.133123  | 1.987528  | 1.035026  |
| H                  | 1.520002  | 5.371266  | 5.934533  | H                   | 1.488917  | 0.164812  | 2.678770  |
| H                  | 2.029288  | 1.202840  | 4.089065  | H                   | 1.646043  | 0.725751  | 6.411708  |
| <b>TS9 (PhC≡N)</b> |           |           |           | <b>TS10 (PhC≡N)</b> |           |           |           |
| Mo                 | -0.162972 | 0.148135  | -0.700367 | Mo                  | 0.223558  | -0.195927 | 0.014949  |
| O                  | -0.399983 | 0.834678  | 0.806048  | Cl                  | -0.252614 | 0.492697  | 2.218810  |
| Cl                 | 1.982872  | -0.465583 | -0.149212 | Cl                  | 2.483081  | -0.299258 | 0.458208  |
| Cl                 | 0.237337  | 2.239071  | -1.689837 | O                   | -0.346746 | -1.742122 | 0.108133  |
| H                  | -1.230953 | 0.137643  | -2.244782 |                     |           |           |           |
| N                  | 0.599202  | -0.825363 | -2.654586 |                     |           |           |           |
| C                  | -0.513602 | -0.531786 | -3.049385 |                     |           |           |           |
| O                  | -1.214005 | -1.401548 | -0.411867 |                     |           |           |           |
| B                  | -1.829119 | -2.327644 | -1.192631 |                     |           |           |           |
| O                  | -1.240710 | -3.506145 | -1.592206 |                     |           |           |           |

|                                  |           |           |           |                                  |           |           |           |
|----------------------------------|-----------|-----------|-----------|----------------------------------|-----------|-----------|-----------|
| O                                | 0.463905  | 0.161108  | -1.825923 | H                                | -0.852873 | 4.253904  | -6.982442 |
| N                                | -1.356077 | 0.937505  | -0.548234 | H                                | -0.162515 | 4.900090  | -4.693705 |
| B                                | -0.610955 | 0.903300  | -2.313802 | H                                | 0.300154  | 3.155291  | -3.003754 |
| C                                | -2.187923 | 1.673438  | 0.079065  | <b>TS9 (PhC=ONH<sub>2</sub>)</b> |           |           |           |
| C                                | -3.362314 | 2.308365  | -0.487908 | Mo                               | -1.314682 | -0.760708 | -0.653516 |
| C                                | -3.985730 | 1.812700  | -1.637643 | Cl                               | -3.089159 | -0.364380 | 0.848642  |
| C                                | -5.099207 | 2.453960  | -2.146040 | Cl                               | -0.108686 | -1.185381 | 1.338660  |
| C                                | -5.592164 | 3.593303  | -1.516488 | O                                | -0.276360 | 0.412494  | -1.179699 |
| C                                | -4.991616 | 4.078338  | -0.360887 | O                                | -0.577740 | -2.457962 | -1.196454 |
| C                                | -3.889484 | 3.427090  | 0.164906  | H                                | -2.509051 | 0.475582  | -1.337747 |
| O                                | -1.500358 | 0.297797  | -3.237129 | O                                | -2.409531 | -1.292419 | -2.259720 |
| C                                | -1.969661 | 1.308144  | -4.004854 | C                                | -2.956439 | -0.095983 | -2.483508 |
| C                                | -1.344838 | 2.506484  | -3.642836 | B                                | -0.255920 | -2.899670 | -2.418704 |
| C                                | -1.659825 | 3.700174  | -4.257077 | O                                | 0.254226  | -2.102410 | -3.441743 |
| C                                | -2.625440 | 3.654150  | -5.260342 | C                                | 0.490904  | -2.961416 | -4.478433 |
| C                                | -3.243705 | 2.457700  | -5.623509 | C                                | 0.134739  | -4.250274 | -4.095523 |
| C                                | -2.927684 | 1.255983  | -4.993902 | C                                | 0.265571  | -5.324283 | -4.944730 |
| O                                | -0.458534 | 2.274770  | -2.648559 | C                                | 0.775106  | -5.056498 | -6.216645 |
| H                                | -1.174930 | 4.625828  | -3.966589 | C                                | 1.132966  | -3.767623 | -6.598675 |
| H                                | -2.900750 | 4.570732  | -5.772319 | C                                | 0.996526  | -2.685463 | -5.727358 |
| H                                | -3.987540 | 2.462573  | -6.414093 | N                                | -2.466208 | 0.577308  | -3.557546 |
| H                                | -3.405504 | 0.320037  | -5.263725 | C                                | -4.409803 | 0.086618  | -2.173691 |
| H                                | -3.415001 | 3.786033  | 1.074273  | C                                | -5.216703 | -1.032957 | -2.001954 |
| H                                | -5.390279 | 4.958521  | 0.132691  | C                                | -6.567331 | -0.864880 | -1.736149 |
| H                                | -6.462982 | 4.098449  | -1.923059 | C                                | -7.103391 | 0.411413  | -1.624622 |
| H                                | -5.589061 | 2.066763  | -3.033869 | C                                | -6.290099 | 1.528238  | -1.779797 |
| H                                | -3.610215 | 0.903463  | -2.095335 | C                                | -4.941651 | 1.368229  | -2.052875 |
| H                                | -2.024193 | 1.868775  | 1.151075  | O                                | -0.333199 | -4.229154 | -2.811404 |
| <b>Im8 (PhC=ONH<sub>2</sub>)</b> |           |           |           | H                                | -0.014878 | -6.326272 | -4.637805 |
| Mo                               | -0.322345 | -0.285957 | -0.239964 | H                                | 0.895446  | -5.874197 | -6.920517 |
| Cl                               | -1.483366 | -1.053366 | 1.696693  | H                                | 1.528881  | -3.597023 | -7.594983 |
| Cl                               | 1.524943  | -0.665775 | 1.273841  | H                                | 1.276720  | -1.677713 | -6.015227 |
| O                                | -0.765369 | -1.592135 | -1.147881 | H                                | -1.497927 | 0.434460  | -3.821882 |
| O                                | -1.294406 | 1.351143  | -0.025589 | H                                | -2.896028 | 1.445965  | -3.847403 |
| H                                | 1.219244  | -0.264548 | -0.835087 | H                                | -4.297245 | 2.239244  | -2.147809 |
| O                                | -0.104132 | 0.829595  | -2.118918 | H                                | -6.706805 | 2.525216  | -1.678743 |
| C                                | 0.138831  | 0.509869  | -3.312595 | H                                | -8.160014 | 0.537785  | -1.408880 |
| N                                | 0.580329  | -0.685873 | -3.659494 | H                                | -7.203362 | -1.735572 | -1.612879 |
| C                                | -0.103683 | 1.527737  | -4.352483 | H                                | -4.787706 | -2.026267 | -2.083949 |
| C                                | 0.001176  | 2.876553  | -4.009623 | <b>Im9 (PhC=ONH<sub>2</sub>)</b> |           |           |           |
| C                                | -0.256161 | 3.851588  | -4.958474 | C                                | -3.434554 | 4.317794  | -6.930792 |
| C                                | -0.641227 | 3.487357  | -6.243148 | C                                | -2.458969 | 3.712311  | -6.136962 |
| C                                | -0.763617 | 2.145851  | -6.582412 | C                                | -2.701407 | 3.498470  | -4.785305 |
| C                                | -0.491326 | 1.164650  | -5.642391 | C                                | -3.904456 | 3.908336  | -4.221284 |
| B                                | -1.891013 | 2.179667  | -0.898581 | C                                | -4.867030 | 4.525318  | -5.007877 |
| O                                | -1.657172 | 3.548214  | -0.943166 | C                                | -4.631703 | 4.728512  | -6.363812 |
| C                                | -2.434321 | 4.007427  | -1.970656 | C                                | -1.165046 | 3.271828  | -6.755824 |
| C                                | -3.140917 | 2.944708  | -2.524021 | H                                | -0.543500 | 2.735987  | -6.021650 |
| C                                | -3.978239 | 3.110697  | -3.602767 | Mo                               | -2.216901 | 0.526651  | -7.747990 |
| C                                | -4.094077 | 4.406728  | -4.109895 | Cl                               | -3.348811 | -1.319091 | -6.821839 |
| C                                | -3.397108 | 5.471590  | -3.548031 | O                                | -3.958845 | 1.204720  | -8.117140 |
| C                                | -2.545275 | 5.289259  | -2.456610 | B                                | -5.089074 | 1.567270  | -7.490086 |
| O                                | -2.838910 | 1.798731  | -1.843486 | O                                | -5.379125 | 1.293088  | -6.161678 |
| H                                | -1.992791 | 6.111897  | -2.014888 | C                                | -6.602514 | 1.862547  | -5.944351 |
| H                                | -3.515746 | 6.466470  | -3.966089 | C                                | -7.049191 | 2.451286  | -7.122195 |
| H                                | -4.745245 | 4.585145  | -4.960029 | C                                | -8.241875 | 3.134221  | -7.188513 |
| H                                | -4.520511 | 2.275113  | -4.032460 | C                                | -8.988874 | 3.198386  | -6.011229 |
| H                                | 0.692447  | -1.422156 | -2.973041 | C                                | -8.546046 | 2.599215  | -4.835053 |
| H                                | 0.846113  | -0.892272 | -4.613736 | C                                | -7.332238 | 1.913099  | -4.779327 |
| H                                | -0.619069 | 0.118873  | -5.906825 | O                                | -6.121695 | 2.256217  | -8.107583 |
| H                                | -1.080417 | 1.861936  | -7.580799 |                                  |           |           |           |

|    |           |           |           |   |           |           |           |
|----|-----------|-----------|-----------|---|-----------|-----------|-----------|
| Cl | -0.534531 | -0.024123 | -6.198291 | O | -1.233745 | -4.094832 | -1.700846 |
| O  | -1.500615 | 2.204052  | -7.722836 | C | -1.775861 | -4.491323 | -2.889966 |
| O  | -1.694082 | -0.091667 | -9.179902 | C | -1.468281 | -5.602526 | -3.640731 |
| H  | -6.972002 | 1.453191  | -3.865083 | C | -2.193078 | -5.783635 | -4.819092 |
| H  | -9.156269 | 2.668344  | -3.939888 | C | -3.177898 | -4.882155 | -5.209520 |
| H  | -9.938408 | 3.724488  | -6.016207 | C | -3.483886 | -3.759762 | -4.439603 |
| H  | -8.579420 | 3.596140  | -8.110148 | C | -2.762648 | -3.588130 | -3.279515 |
| H  | -1.945041 | 3.011951  | -4.173312 | O | -2.873345 | -2.598537 | -2.347899 |
| H  | -4.089916 | 3.740105  | -3.164643 | S | 1.406813  | -2.942268 | 1.578083  |
| H  | -5.810398 | 4.840321  | -4.570009 | C | 2.681440  | -4.030666 | 0.921484  |
| H  | -5.390161 | 5.199240  | -6.982928 | C | 2.640347  | -4.418698 | -0.407136 |
| H  | -3.254654 | 4.463218  | -7.993981 | C | 3.639734  | -5.262131 | -0.872603 |
| N  | -0.463084 | 4.281852  | -7.422278 | C | 4.644330  | -5.696303 | -0.017609 |
| H  | -0.863795 | 5.208347  | -7.376461 | C | 4.664209  | -5.291363 | 1.311392  |
| H  | 0.539843  | 4.275610  | -7.302464 | C | 3.677576  | -4.444191 | 1.793063  |

#### TS10 (PhC=ONH<sub>2</sub>)

|    |           |           |           |
|----|-----------|-----------|-----------|
| Mo | 0.052534  | 0.524531  | -0.108160 |
| Cl | -0.353978 | 0.090069  | 2.107089  |
| Cl | 1.606364  | 2.120783  | 0.362921  |
| O  | -1.250204 | 1.384262  | -0.632810 |
| O  | 0.978191  | -0.145199 | -1.566249 |
| O  | -0.497433 | -1.382424 | -0.417748 |
| B  | 0.901036  | -1.565007 | -1.564954 |
| O  | 0.540807  | -2.228150 | -2.747152 |
| C  | 1.206763  | -3.415444 | -2.711337 |
| C  | 2.022196  | -3.462612 | -1.580265 |
| C  | 2.825841  | -4.546762 | -1.309315 |
| C  | 2.786723  | -5.602627 | -2.222227 |
| C  | 1.976400  | -5.554488 | -3.352447 |
| C  | 1.162376  | -4.451026 | -3.616379 |
| O  | 1.885750  | -2.310112 | -0.873548 |
| C  | -1.354287 | -2.320207 | 0.326226  |
| N  | -2.649244 | -1.805405 | 0.562256  |
| C  | -1.405870 | -3.604668 | -0.454542 |
| C  | -2.087532 | -3.675690 | -1.667866 |
| C  | -2.177348 | -4.879888 | -2.347059 |
| C  | -1.585585 | -6.024056 | -1.821229 |
| C  | -0.896452 | -5.956334 | -0.619385 |
| C  | -0.801667 | -4.746145 | 0.057630  |
| H  | -0.850274 | -2.488963 | 1.285887  |
| H  | 3.457687  | -4.573845 | -0.427552 |
| H  | 3.406185  | -6.476891 | -2.046167 |
| H  | 1.974290  | -6.392043 | -4.043390 |
| H  | 0.524446  | -4.404553 | -4.493080 |
| H  | -0.259109 | -4.686518 | 0.998534  |
| H  | -0.424656 | -6.844386 | -0.209262 |
| H  | -1.657299 | -6.967184 | -2.355298 |
| H  | -2.707648 | -4.928177 | -3.293790 |
| H  | -2.541177 | -2.783628 | -2.093576 |
| H  | -3.171449 | -1.609396 | -0.286230 |
| H  | -2.674611 | -1.003954 | 1.182454  |

#### TS11 (Ph<sub>2</sub>S=O)

|    |           |           |           |
|----|-----------|-----------|-----------|
| Mo | -0.679525 | -0.860114 | -0.246592 |
| Cl | -1.251416 | -1.145776 | 2.103061  |
| Cl | 1.005322  | 0.643672  | 0.024968  |
| O  | -1.976982 | 0.163483  | -0.467854 |
| O  | 0.698503  | -2.481762 | 0.281277  |
| O  | -0.566669 | -1.601820 | -1.809574 |
| H  | -1.986117 | -2.510930 | -0.268801 |
| B  | -1.836835 | -2.857176 | -1.447843 |

|   |           |           |           |
|---|-----------|-----------|-----------|
| O | -1.233745 | -4.094832 | -1.700846 |
| C | -1.775861 | -4.491323 | -2.889966 |
| C | -1.468281 | -5.602526 | -3.640731 |
| C | -2.193078 | -5.783635 | -4.819092 |
| C | -3.177898 | -4.882155 | -5.209520 |
| C | -3.483886 | -3.759762 | -4.439603 |
| C | -2.762648 | -3.588130 | -3.279515 |
| O | -2.873345 | -2.598537 | -2.347899 |
| S | 1.406813  | -2.942268 | 1.578083  |
| C | 2.681440  | -4.030666 | 0.921484  |
| C | 2.640347  | -4.418698 | -0.407136 |
| C | 3.639734  | -5.262131 | -0.872603 |
| C | 4.644330  | -5.696303 | -0.017609 |
| C | 4.664209  | -5.291363 | 1.311392  |
| C | 3.677576  | -4.444191 | 1.793063  |
| C | 0.318505  | -4.180870 | 2.290382  |
| C | -0.468371 | -4.967820 | 1.463263  |
| C | -1.293943 | -5.911114 | 2.054361  |
| C | -1.313123 | -6.057646 | 3.437461  |
| C | -0.515468 | -5.258490 | 4.244150  |
| C | 0.306831  | -4.297521 | 3.670423  |
| H | -4.251179 | -3.051678 | -4.733544 |
| H | -3.722754 | -5.053389 | -6.132484 |
| H | -1.981312 | -6.645862 | -5.443442 |
| H | -0.699432 | -6.300149 | -3.326246 |
| H | -0.444475 | -4.838356 | 0.384110  |
| H | -1.926134 | -6.536329 | 1.431886  |
| H | -1.962803 | -6.800250 | 3.889989  |
| H | -0.542183 | -5.369974 | 5.323098  |
| H | 0.918227  | -3.645226 | 4.288670  |
| H | 3.685354  | -4.114579 | 2.829323  |
| H | 5.454099  | -5.629306 | 1.974246  |
| H | 5.423142  | -6.353347 | -0.391916 |
| H | 3.632748  | -5.578404 | -1.910853 |
| H | 1.846543  | -4.058115 | -1.054516 |

#### Im11 (Ph<sub>2</sub>S=O)

|    |           |           |           |
|----|-----------|-----------|-----------|
| C  | -5.835985 | 1.628956  | 1.940757  |
| C  | -4.672524 | 2.356181  | 2.037071  |
| C  | -3.863237 | 2.311238  | 3.167420  |
| C  | -4.197408 | 1.562160  | 4.270424  |
| C  | -5.382618 | 0.829594  | 4.190901  |
| C  | -6.179576 | 0.855554  | 3.051180  |
| O  | -2.768051 | 3.108234  | 2.973453  |
| B  | -2.916937 | 3.588646  | 1.687480  |
| O  | -4.115130 | 3.202079  | 1.114654  |
| O  | -2.029118 | 4.420166  | 1.071372  |
| Mo | -0.401803 | 3.982533  | 0.237589  |
| O  | -1.497451 | 2.008219  | 0.520940  |
| S  | -1.148828 | 0.537605  | 0.197492  |
| C  | -1.588797 | -0.327681 | 1.710677  |
| C  | -2.818021 | -0.936551 | 1.926343  |
| C  | -3.044848 | -1.555841 | 3.147467  |
| C  | -2.068515 | -1.541041 | 4.134452  |
| C  | -0.853299 | -0.904839 | 3.913644  |
| C  | -0.604128 | -0.297812 | 2.693111  |
| O  | 0.399929  | 5.429059  | 0.266059  |
| Cl | -0.597972 | 3.423317  | -2.045786 |
| Cl | 1.594940  | 2.595066  | 0.157640  |
| C  | -2.451693 | -0.006769 | -0.903418 |
| C  | -3.562342 | 0.793016  | -1.114435 |
| C  | -4.562191 | 0.319049  | -1.953514 |

|   |           |           |           |
|---|-----------|-----------|-----------|
| C | -4.437660 | -0.925128 | -2.557217 |
| C | -3.308876 | -1.706495 | -2.337797 |
| C | -2.297546 | -1.246153 | -1.509012 |
| H | 0.070146  | 3.487645  | 1.756243  |
| H | -3.564829 | 1.541658  | 5.151559  |
| H | -5.684613 | 0.221246  | 5.037908  |
| H | -7.092455 | 0.269033  | 3.024246  |
| H | -6.453401 | 1.666232  | 1.048982  |
| H | -3.589545 | -0.939779 | 1.161676  |
| H | -3.996726 | -2.045063 | 3.328550  |
| H | -2.256019 | -2.030113 | 5.085423  |
| H | -0.093111 | -0.891165 | 4.687724  |
| H | 0.349865  | 0.188454  | 2.502388  |
| H | -1.409741 | -1.847521 | -1.329019 |
| H | -3.212363 | -2.674691 | -2.818121 |
| H | -5.224473 | -1.288895 | -3.210571 |
| H | -5.442306 | 0.928172  | -2.134562 |
| H | -3.641166 | 1.762173  | -0.629885 |

**TS12 (Ph2S=O)**

|    |           |           |           |
|----|-----------|-----------|-----------|
| Mo | 0.579184  | -0.527816 | -0.564378 |
| Cl | -0.777230 | 1.529511  | -0.405864 |
| Cl | 0.866217  | -0.183046 | 1.790009  |
| O  | 1.987129  | -0.002915 | -1.208530 |
| O  | 0.773640  | -2.542897 | -0.191722 |
| O  | -0.224889 | -1.492247 | -2.291838 |
| H  | -0.435909 | -0.126511 | -1.832717 |
| B  | -1.107168 | -2.483134 | -2.174746 |
| O  | -1.196700 | -3.560065 | -3.055498 |
| C  | -2.240638 | -4.311573 | -2.597929 |
| C  | -2.749637 | -5.481437 | -3.112115 |
| C  | -3.838236 | -6.043020 | -2.440338 |
| C  | -4.378612 | -5.444271 | -1.308412 |
| C  | -3.854379 | -4.256023 | -0.795090 |
| C  | -2.783260 | -3.712878 | -1.464199 |
| O  | -2.092892 | -2.568233 | -1.186478 |
| S  | 0.878824  | -3.354701 | 1.157596  |
| C  | 2.603538  | -3.852973 | 1.185888  |
| C  | 3.481059  | -3.405050 | 0.213985  |
| C  | 4.810865  | -3.797514 | 0.302580  |
| C  | 5.232360  | -4.611978 | 1.343327  |
| C  | 4.332453  | -5.043507 | 2.311085  |
| C  | 3.003207  | -4.660007 | 2.242684  |
| C  | 0.062483  | -4.872381 | 0.715112  |
| C  | 0.447083  | -5.597535 | -0.407993 |
| C  | -0.281057 | -6.727058 | -0.736590 |
| C  | -1.362979 | -7.117313 | 0.049155  |
| C  | -1.730276 | -6.381344 | 1.165397  |
| C  | -1.019557 | -5.237804 | 1.504370  |
| H  | -4.268760 | -3.777754 | 0.086473  |
| H  | -5.226945 | -5.906058 | -0.812463 |
| H  | -4.271846 | -6.964942 | -2.815615 |
| H  | -2.322893 | -5.938513 | -3.998927 |
| H  | 1.294672  | -5.283439 | -1.010549 |
| H  | -0.006703 | -7.308813 | -1.610743 |
| H  | -1.929623 | -8.003149 | -0.221037 |
| H  | -2.580139 | -6.685212 | 1.767727  |
| H  | -1.304619 | -4.639875 | 2.365369  |
| H  | 2.291602  | -4.990124 | 2.995589  |
| H  | 4.666980  | -5.677516 | 3.125534  |
| H  | 6.273417  | -4.912671 | 1.404106  |
| H  | 5.517370  | -3.460831 | -0.448961 |

|   |          |           |           |
|---|----------|-----------|-----------|
| H | 3.139128 | -2.770753 | -0.596749 |
|---|----------|-----------|-----------|

**Im12 (Ph2S=O)**

|    |           |          |          |
|----|-----------|----------|----------|
| Mo | -6.243025 | 2.062899 | 1.849569 |
| Cl | -4.370877 | 3.545992 | 1.712603 |
| Cl | -5.141037 | 0.572486 | 0.230250 |
| O  | -7.383449 | 2.824562 | 0.958408 |
| O  | -6.627016 | 2.822588 | 3.813662 |
| S  | -6.011923 | 4.132536 | 4.427975 |
| C  | -6.753704 | 5.479253 | 3.505447 |
| C  | -6.950844 | 4.290375 | 5.953776 |
| C  | -8.100996 | 5.441570 | 3.173830 |
| C  | -8.626575 | 6.490419 | 2.438340 |
| C  | -7.813344 | 7.553195 | 2.057816 |
| C  | -6.469906 | 7.575108 | 2.404158 |
| C  | -5.924553 | 6.524457 | 3.129067 |
| H  | -4.869287 | 6.514563 | 3.387003 |
| H  | -5.839078 | 8.402863 | 2.097794 |
| H  | -8.234034 | 8.370161 | 1.479995 |
| H  | -9.675512 | 6.480118 | 2.160619 |
| H  | -8.723697 | 4.606397 | 3.481645 |
| C  | -6.559627 | 5.306756 | 6.815098 |
| C  | -7.260877 | 5.481163 | 7.997150 |
| C  | -8.322856 | 4.639285 | 8.305869 |
| C  | -8.688261 | 3.621429 | 7.435995 |
| C  | -7.999330 | 3.435064 | 6.244207 |
| H  | -8.265035 | 2.642114 | 5.553737 |
| H  | -9.514807 | 2.963460 | 7.684539 |
| H  | -8.867266 | 4.777497 | 9.234743 |
| H  | -6.973310 | 6.273163 | 8.680982 |
| H  | -5.725949 | 5.958959 | 6.564814 |

**TS13 (Ph2S=O)**

|    |           |          |          |
|----|-----------|----------|----------|
| Mo | -6.735333 | 2.079471 | 1.960769 |
| Cl | -4.917652 | 3.493602 | 1.498406 |
| Cl | -5.841575 | 0.365336 | 0.420649 |
| O  | -7.969152 | 2.770905 | 1.123458 |
| O  | -6.915022 | 2.796309 | 3.711302 |
| S  | -6.000384 | 4.257125 | 4.457280 |
| C  | -6.599868 | 5.646029 | 3.538225 |
| C  | -7.012054 | 4.294812 | 5.929411 |
| C  | -7.950158 | 5.770297 | 3.227948 |
| C  | -8.354308 | 6.843084 | 2.449606 |
| C  | -7.422442 | 7.767406 | 1.992373 |
| C  | -6.076791 | 7.628659 | 2.309335 |
| C  | -5.654872 | 6.559529 | 3.081883 |
| H  | -4.603398 | 6.427099 | 3.320946 |
| H  | -5.351505 | 8.350102 | 1.947772 |
| H  | -7.747587 | 8.601877 | 1.378982 |
| H  | -9.402971 | 6.954761 | 2.193753 |
| H  | -8.670039 | 5.042259 | 3.589564 |
| C  | -7.390511 | 5.513139 | 6.484454 |
| C  | -8.075046 | 5.518011 | 7.689740 |
| C  | -8.367278 | 4.323244 | 8.334038 |
| C  | -7.973274 | 3.115396 | 7.774710 |
| C  | -7.285199 | 3.091317 | 6.570220 |
| H  | -6.979033 | 2.150638 | 6.126762 |
| H  | -8.201142 | 2.181146 | 8.278066 |
| H  | -8.903309 | 4.334400 | 9.277821 |
| H  | -8.378717 | 6.464099 | 8.126365 |
| H  | -7.157554 | 6.448381 | 5.985256 |

**HOBcat**

|   |           |          |           |
|---|-----------|----------|-----------|
| C | 1.231238  | 0.000000 | -0.619816 |
| C | 0.031418  | 0.000000 | 0.082979  |
| C | -0.003298 | 0.000000 | 1.456980  |
| C | 1.226915  | 0.000000 | 2.115775  |
| C | 2.425143  | 0.000000 | 1.413008  |
| C | 2.448649  | 0.000000 | 0.017550  |
| O | -1.014593 | 0.000000 | -0.798034 |
| B | -0.421837 | 0.000000 | -2.047239 |
| O | 0.964874  | 0.000000 | -1.963945 |
| H | -0.945582 | 0.000000 | 1.992877  |
| H | 1.245909  | 0.000000 | 3.200607  |
| H | 3.363647  | 0.000000 | 1.957562  |
| H | 3.375735  | 0.000000 | -0.544438 |
| O | -1.125867 | 0.000000 | -3.187704 |
| H | -0.571038 | 0.000000 | -3.968845 |

**Ph<sub>2</sub>S**

|   |           |           |           |
|---|-----------|-----------|-----------|
| C | 2.834137  | -1.410645 | 1.879719  |
| C | 1.678858  | -0.827893 | 2.397404  |
| C | 1.772735  | 0.172264  | 3.359057  |
| C | 3.022316  | 0.587514  | 3.803909  |
| C | 4.173498  | 0.020049  | 3.278515  |
| C | 4.076402  | -0.975948 | 2.312622  |
| S | 0.059463  | -1.399171 | 1.892908  |
| C | 0.142444  | -1.181365 | 0.118853  |
| C | -0.423771 | -2.160020 | -0.692407 |
| C | -0.439826 | -1.991634 | -2.071050 |
| C | 0.123394  | -0.860792 | -2.644053 |
| C | 0.694018  | 0.111819  | -1.830932 |
| C | 0.695490  | -0.037551 | -0.453157 |
| H | -0.845687 | -3.056094 | -0.245562 |
| H | -0.882981 | -2.759172 | -2.698704 |
| H | 0.120003  | -0.736078 | -3.722512 |
| H | 1.132305  | 1.001934  | -2.272846 |
| H | 1.128993  | 0.732267  | 0.179473  |
| H | 0.869625  | 0.629084  | 3.753715  |
| H | 3.091819  | 1.368352  | 4.555416  |
| H | 5.149028  | 0.352642  | 3.619925  |
| H | 4.975819  | -1.425821 | 1.902617  |
| H | 2.756740  | -2.199398 | 1.136246  |
